# Supplementary material for: Anti-Browning Effect of 2-Mercaptobenzo[d]imidazole Analogs with Antioxidant Activity on Freshly-Cut Apple Slices and Their Highly Potent Tyrosinase Inhibitory Activity
Source: MDPI journal article supplement (doi:10.3390/antiox12101814), 2023-09-29
Supplement: s1 [file s1]

## Supplementary Material

# Anti-Browning Effect of 2-Mercaptobenzo[d]imidazole Analogues with Antioxidant Activity on Freshly-Cut Apple Slices and Their Highly Potent Tyrosinase Inhibitory Activity

Jieun Lee <sup>1,†</sup>, Hye Soo Park <sup>1,†</sup>, Hee Jin Jung <sup>2,†</sup>, Yu Jung Park <sup>1</sup>, Min Kyung Kang <sup>1</sup>, Hye Jin Kim <sup>1</sup>,  
Dahye Yoon <sup>1</sup>, Sultan Ullah <sup>3</sup>, Dongwan Kang <sup>4</sup>, Yujin Park <sup>4</sup>, Pusoon Chun <sup>5</sup>, Hae Young Chung <sup>2</sup>  
and Hyung Ryong Moon <sup>1,\*</sup>

<sup>1</sup> Department of Manufacturing Pharmacy, College of Pharmacy and Research Institute for Drug Development, Pusan National University, Busan 46241, Republic of Korea; yjiun@pusan.ac.kr (J.L.); hyesoo0713@pusan.ac.kr (H.S.P.); wjd9933@pusan.ac.kr (Y.J.P.); kmk87106@pusan.ac.kr (M.K.K.); khj3358@pusan.ac.kr (H.J.K.); dahae0528@pusan.ac.kr (D.Y.)

<sup>2</sup> Department of Pharmacy, College of Pharmacy and Research Institute for Drug Development, Pusan National University, Busan 46241, Republic of Korea; hjjung2046@pusan.ac.kr (H.J.J.); hyjung@pusan.ac.kr (H.Y.C.)

<sup>3</sup> Department of Molecular Medicine, The Herbert Wertheim UF Scripps Institute for Biomedical Innovation & Technology, Jupiter, FL 33458, USA; sultanullahf@ufl.edu

<sup>4</sup> Department of Medicinal Chemistry, New Drug Development Center, Daegu-Gyeongbuk Medical Innovation Foundation, Daegu 41061, Republic of Korea; kdw4106@kmedihub.re.kr (D.K.); pyj1016@kmedihub.re.kr (Y.P.)

<sup>5</sup> College of Pharmacy and Inje Institute of Pharmaceutical Sciences and Research, Inje University, Gimhae 50834, Republic of Korea; pusoon@inje.ac.kr

\* Correspondence: mhr108@pusan.ac.kr; Tel.: +82-51-510-2815; Fax: +82-51-513-6754

† These authors contributed equally to this work.

## Contents

|                                                                                                            |    |
|------------------------------------------------------------------------------------------------------------|----|
| <i>1. Synthesis of benzimidazole derivatives without the 2-mercapto substituent of 2-MBI analogs</i> ..... | 4  |
| <b>Table S1</b> .....                                                                                      | 6  |
| <b>Table S2</b> .....                                                                                      | 8  |
| <b>Table S3</b> .....                                                                                      | 10 |
| <b>Table S4</b> .....                                                                                      | 10 |
| Figure S1. <sup>1</sup> H NMR spectrum of analog <b>1</b> .....                                            | 11 |
| Figure S2. <sup>13</sup> C NMR spectrum of analog <b>1</b> .....                                           | 12 |
| Figure S3. <sup>1</sup> H NMR spectrum of analog <b>2</b> .....                                            | 13 |
| Figure S4. <sup>13</sup> C NMR spectrum of analog <b>2</b> .....                                           | 14 |
| Figure S5. <sup>1</sup> H NMR spectrum of analog <b>3</b> .....                                            | 15 |
| Figure S6. <sup>13</sup> C NMR spectrum of analog <b>3</b> .....                                           | 16 |
| Figure S7. <sup>1</sup> H NMR spectrum of analog <b>4</b> .....                                            | 17 |
| Figure S8. <sup>13</sup> C NMR spectrum of analog <b>4</b> .....                                           | 18 |
| Figure S9. <sup>1</sup> H NMR spectrum of analog <b>5</b> .....                                            | 19 |
| Figure S10. <sup>13</sup> C NMR spectrum of analog <b>5</b> .....                                          | 20 |
| Figure S11. <sup>1</sup> H NMR spectrum of analog <b>6</b> .....                                           | 21 |
| Figure S12. <sup>13</sup> C NMR spectrum of analog <b>6</b> .....                                          | 22 |

|                                                                                                         |    |
|---------------------------------------------------------------------------------------------------------|----|
| Figure S13. $^1\text{H}$ NMR spectrum of analog <b>7</b> .....                                          | 23 |
| Figure S14. $^{13}\text{C}$ NMR spectrum of analog <b>7</b> .....                                       | 24 |
| Figure S15. $^1\text{H}$ NMR spectrum of analog <b>8</b> .....                                          | 25 |
| Figure S16. $^{13}\text{C}$ NMR spectrum of analog <b>8</b> .....                                       | 26 |
| Figure S17. $^1\text{H}$ NMR spectrum of analog <b>9</b> .....                                          | 27 |
| Figure S18. $^{13}\text{C}$ NMR spectrum of analog <b>9</b> .....                                       | 28 |
| Figure S19. $^1\text{H}$ NMR spectrum of analog <b>10</b> .....                                         | 29 |
| Figure S20. $^{13}\text{C}$ NMR spectrum of analog <b>10</b> .....                                      | 30 |
| Figure S21. $^1\text{H}$ NMR spectrum of analog 1 <i>H</i> -benzo[ <i>d</i> ]imidazole.....             | 31 |
| Figure S22. $^{13}\text{C}$ NMR spectrum of analog 1 <i>H</i> -benzo[ <i>d</i> ]imidazole.....          | 32 |
| Figure S23. $^1\text{H}$ NMR spectrum of analog 5-methyl-1 <i>H</i> -benzo[ <i>d</i> ]imidazole.....    | 33 |
| Figure S24. $^{13}\text{C}$ NMR spectrum of analog 5-methyl-1 <i>H</i> -benzo[ <i>d</i> ]imidazole..... | 34 |
| Figure S25. $^1\text{H}$ NMR spectrum of analog 5-nitro-1 <i>H</i> -benzo[ <i>d</i> ]imidazole.....     | 35 |
| Figure S26. $^{13}\text{C}$ NMR spectrum of analog 5-nitro-1 <i>H</i> -benzo[ <i>d</i> ]imidazole.....  | 36 |
| Figure S27. $^1\text{H}$ NMR spectrum of analog 5-chloro-1 <i>H</i> -benzo[ <i>d</i> ]imidazole.....    | 37 |
| Figure S28. $^{13}\text{C}$ NMR spectrum of analog 5-chloro-1 <i>H</i> -benzo[ <i>d</i> ]imidazole..... | 38 |

## 1. Synthesis of benzimidazole derivatives without the 2-mercapto substituent of 2-MBI analogs

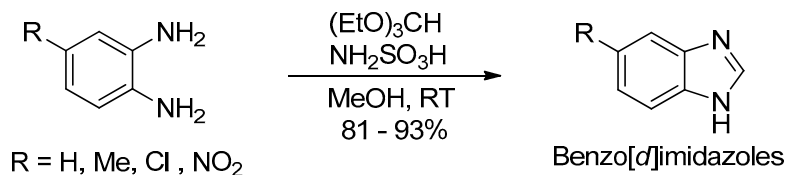

### 1.1. General procedures for 1,2-phenylenediamine derivatives

A solution of 1,2-phenylenediamine derivatives (1,2-phenylenediamine, 4-methyl-1,2-phenylenediamine, 4-chloro-1,2-phenylenediamine, and 4-nitro-1,2-phenylenediamine) (100 mg) and triethyl orthoformate (1.2 equiv.) in methanol (3 mL) was stirred in the presence of sulfamic acid (0.05 equiv.) at room temperature for 4 – 12 h. After cooling, the reaction mixture was partitioned between ethyl acetate and water and the organic layer was dried over  $\text{MgSO}_4$ , filtered, and evaporated to afford 1,2-phenylenediamine derivatives as solids in 81–93 % yields.

### 1.2. NMR data for benzimidazole derivatives without the 2-mercapto substituent of 2-MBI analogs

#### 1H-Benzo[d]imidazole

$^1\text{H}$  NMR (400 MHz,  $\text{DMSO}-d_6$ )  $\delta$  12.39 (brs, 1H, NH), 8.20 (s, 1H, 2-H), 7.65–7.55 (brm, 2H, 4-H, 7-H), 7.18 (dd, 2H,  $J = 6.0, 2.8$  Hz, 5-H, 6-H);  $^{13}\text{C}$  NMR (100 MHz,  $\text{DMSO}-d_6$ )  $\delta$  142.5, 138.7, 122.3, 115.9.

#### 5-Methyl-1H-benzo[d]imidazole

$^1\text{H}$  NMR (400 MHz,  $\text{CDCl}_3$ )  $\delta$  8.05 (s, 1H, 2-H), 7.56 (d, 1H,  $J = 8.0$  Hz, 7-H), 7.44 (d, 1H,  $J = 1.2$  Hz, 4-H), 7.12 (dd, 1H,  $J = 8.0, 1.2$  Hz, 6-H), 2.48 (s, 3H,  $\text{CH}_3$ );  $^{13}\text{C}$  NMR (100 MHz,

$\text{CDCl}_3$ )  $\delta$  140.6, 137.5, 136.4, 132.8, 124.5, 115.5, 114.9, 21.7.

5-Nitro-1*H*-benzo[*d*]imidazole

$^1\text{H}$  NMR (400 MHz,  $\text{DMSO-}d_6$ )  $\delta$  8.54 (s, 1H, 2-H), 8.51 (d, 1H,  $J = 2.4$  Hz, 4-H), 8.11 (dd, 1H,  $J = 8.8, 2.4$  Hz, 6-H), 7.76 (d, 1H,  $J = 8.8$  Hz, 7-H);  $^{13}\text{C}$  NMR (100 MHz,  $\text{DMSO-}d_6$ )  $\delta$  147.3, 143.2, 142.1, 139.0, 118.2, 115.5, 113.3.

5-Chloro-1*H*-benzo[*d*]imidazole

$^1\text{H}$  NMR (400 MHz,  $\text{CDCl}_3$ )  $\delta$  8.12 (s, 1H, 2-H), 7.66 (d, 1H,  $J = 2.0$ , 4-H), 7.58 (d, 1H,  $J = 8.8$  Hz, 7-H), 7.27 (dd, 1H,  $J = 8.8, 2.0$  Hz, 6-H);  $^{13}\text{C}$  NMR (100 MHz,  $\text{CDCl}_3$ )  $\delta$  141.8, 138.4, 136.5, 128.8, 123.7, 116.4, 115.4.

**Table S1.** Docking simulation of 2-MBI analogs, **3 – 5** and **7 – 10** and mushroom tyrosinase (PDB ID: 2Y9X) using the AutoDock Vina

| Compd.   | Pharmacophore analysis | 3D structure | Docking score (Kcal/mol) |
|----------|------------------------|--------------|--------------------------|
| <b>3</b> |                        |              | –5.9                     |
| <b>4</b> |                        |              | –5.6                     |
| <b>5</b> |                        |              | –5.9                     |
| <b>7</b> |                        |              | –5.8                     |

|    |                                                                                                                                                         |                                                                                     |      |
|----|---------------------------------------------------------------------------------------------------------------------------------------------------------|-------------------------------------------------------------------------------------|------|
| 8  | <div> <div>VAL283A</div> <div>PHE292A</div> <div>ALA286A</div> 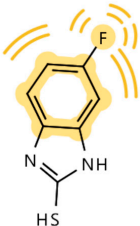 </div> |   | -5.9 |
| 9  | <div> <div>PHE264A</div> <div>VAL283A</div> <div>ALA286A</div>  </div> |   | -5.8 |
| 10 | <div> <div>VAL283A</div> <div>ALA286A</div>  </div>                   |  | -5.9 |

**Table S2.** Docking simulation of benzo[d]imidazoles lacking of the 2-mercapto substituent in 2-MBI analogs **1–10** and mushroom tyrosinase (PDB ID: 2Y9X) using the AutoDock Vina.

| 2-Demercapto compd. | Pharmacophore analysis                                                              | 3D structure                                                                         | Docking score (Kcal/mol) |
|---------------------|-------------------------------------------------------------------------------------|--------------------------------------------------------------------------------------|--------------------------|
| <b>1'</b>           | 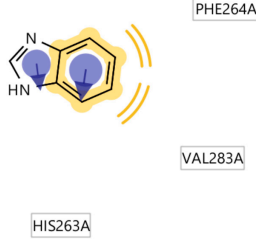   |    | –6.0                     |
| <b>2'</b>           |   |   | –5.9                     |
| <b>3'</b>           |  |  | –5.9                     |
| <b>4'</b>           |  |  | –5.9                     |
| <b>5'</b>           |  |  | –6.0                     |



|     |                                                                                                                                  |                                                                                      |      |
|-----|----------------------------------------------------------------------------------------------------------------------------------|--------------------------------------------------------------------------------------|------|
| 6'  | <p>ALA286A HIS263A</p> 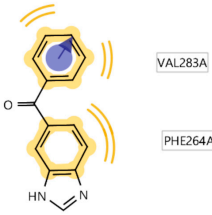 <p>VAL283A PHE264A</p>  |    | -7.5 |
| 7'  | <p>VAL283A ALA286A</p>                          |    | -6.1 |
| 8'  | <p>PHE264A</p> <p>VAL283A</p>  <p>HIS263A</p>  |   | -6.3 |
| 9'  | <p>ALA286A</p> <p>PHE264A</p>  <p>VAL283A</p> |  | -6.0 |
| 10' | <p>HIS263A</p>  <p>PHE264A</p> <p>VAL283A</p> |  | -6.2 |

**Table S3.** Mushroom tyrosinase inhibition of 2-imidazolinethione at 3 different concentrations (4, 20 and 100  $\mu\text{M}$ ) in the presence of L-dopa

| Compound            | Concentration ( $\mu\text{M}$ ) | Tyrosinase activity inhibition (%) |
|---------------------|---------------------------------|------------------------------------|
| 2-imidazolinethione | 4                               | $3.16 \pm 1.26$                    |
|                     | 20                              | $5.34 \pm 0.42$                    |
|                     | 100                             | $5.34 \pm 0.63$                    |

**Table S4.** Docking simulation of 2-imidazolinethione and mushroom tyrosinase (PDB ID: 2Y9X) using the AutoDock Vina

| Compd.              | Pharmacophore analysis                                                                                                     | 3D structure                                                                         | Docking score (Kcal/mol) |
|---------------------|----------------------------------------------------------------------------------------------------------------------------|--------------------------------------------------------------------------------------|--------------------------|
| 2-imidazolinethione | 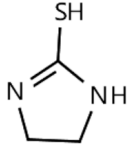 <p>No characteristic interactions.</p> |  | -3.6                     |

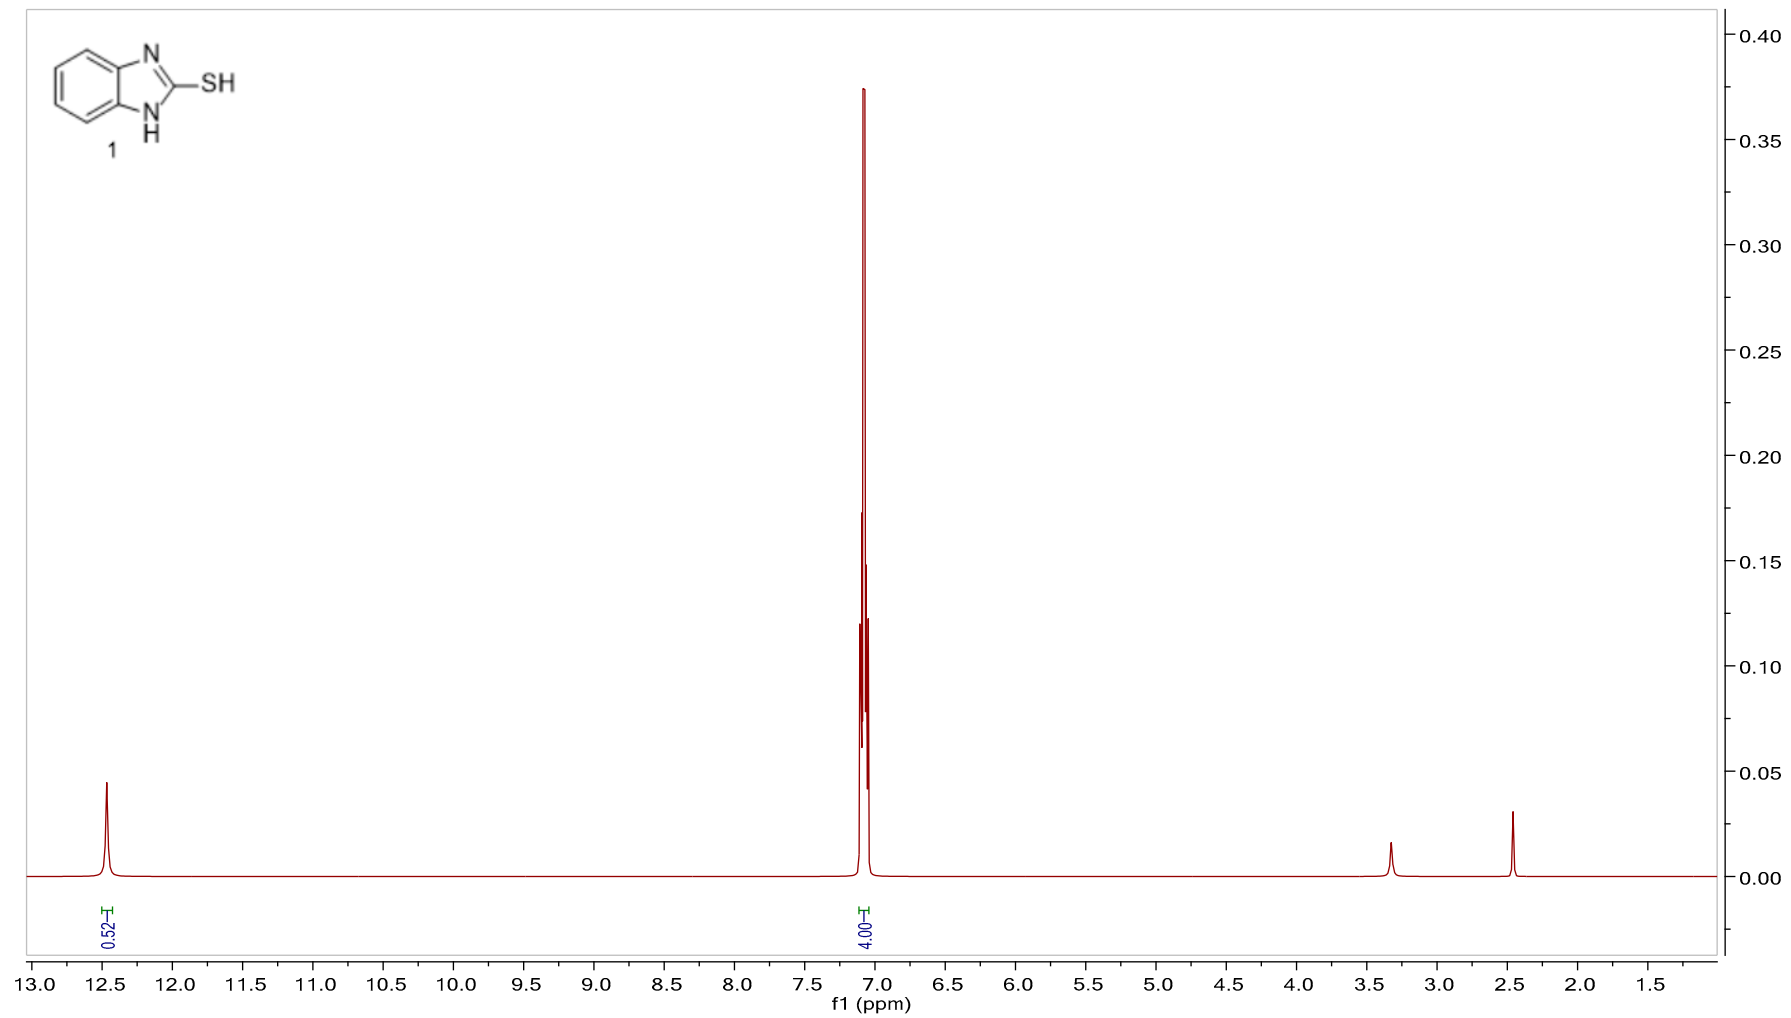

Figure S1. <sup>1</sup>H NMR spectrum of analog **1**

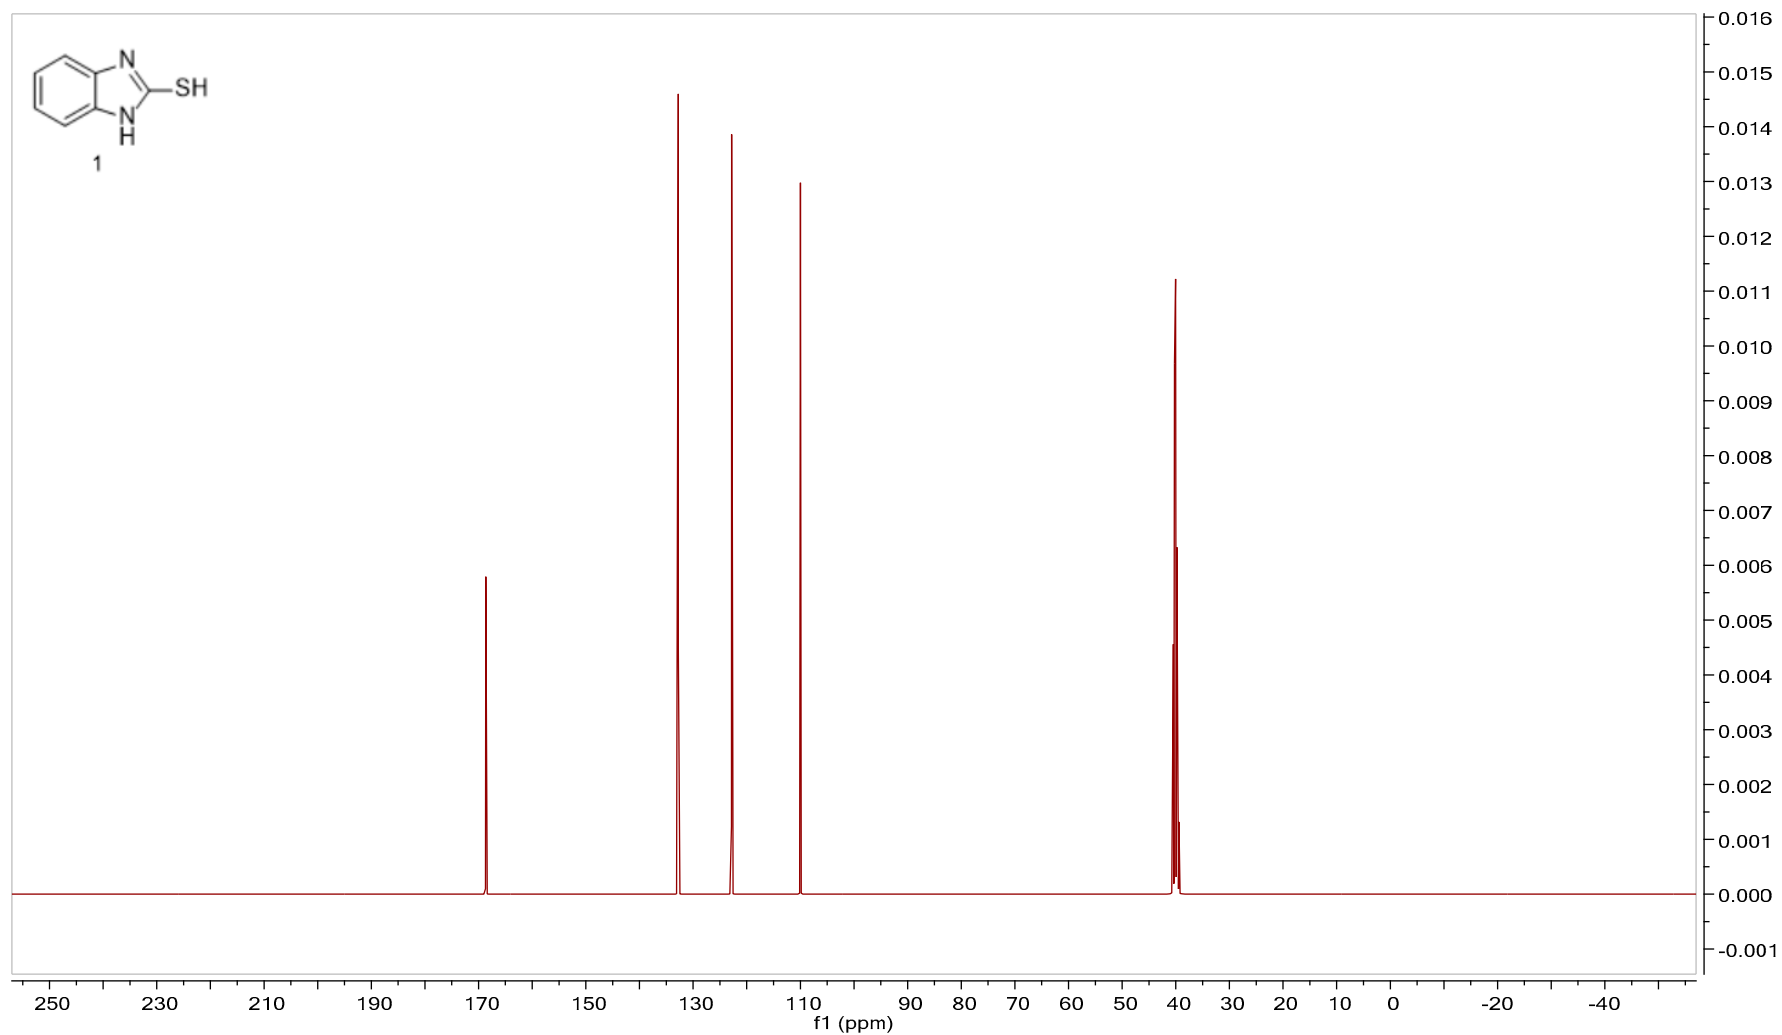

Figure S2.  $^{13}\text{C}$  NMR spectrum of analog **1**

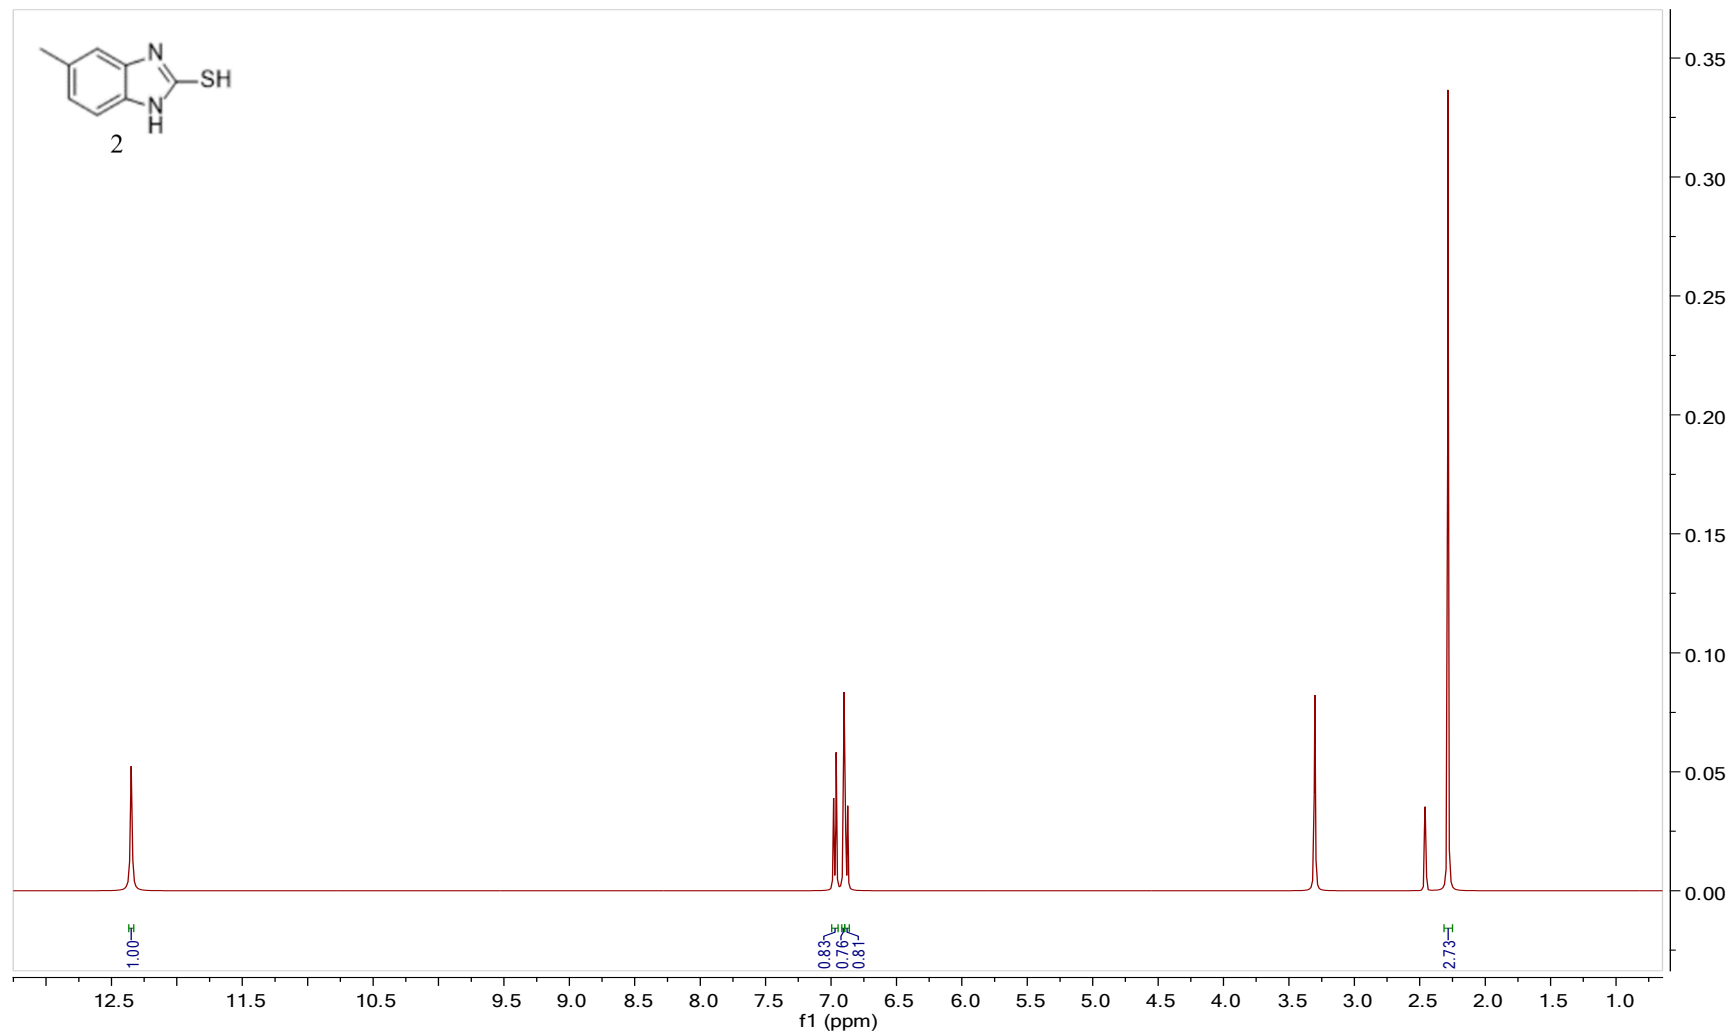

Figure S3. <sup>1</sup>H NMR spectrum of analog **2**

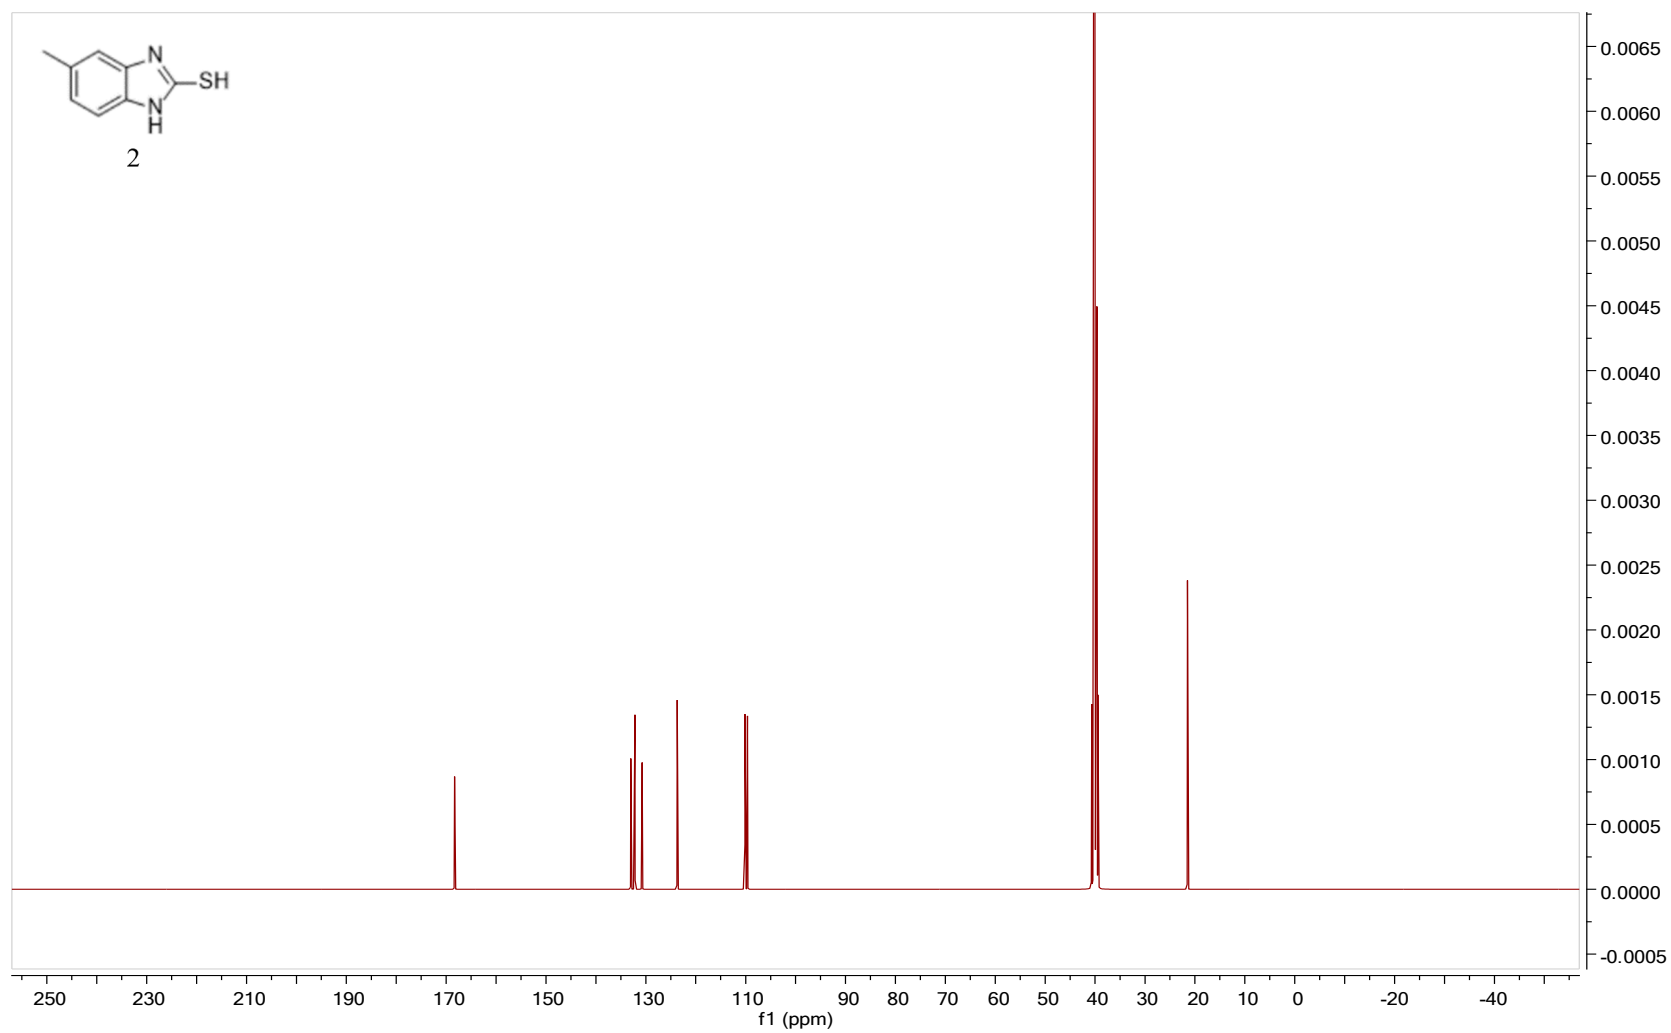

Figure S4.  $^{13}\text{C}$  NMR spectrum of analog **2**

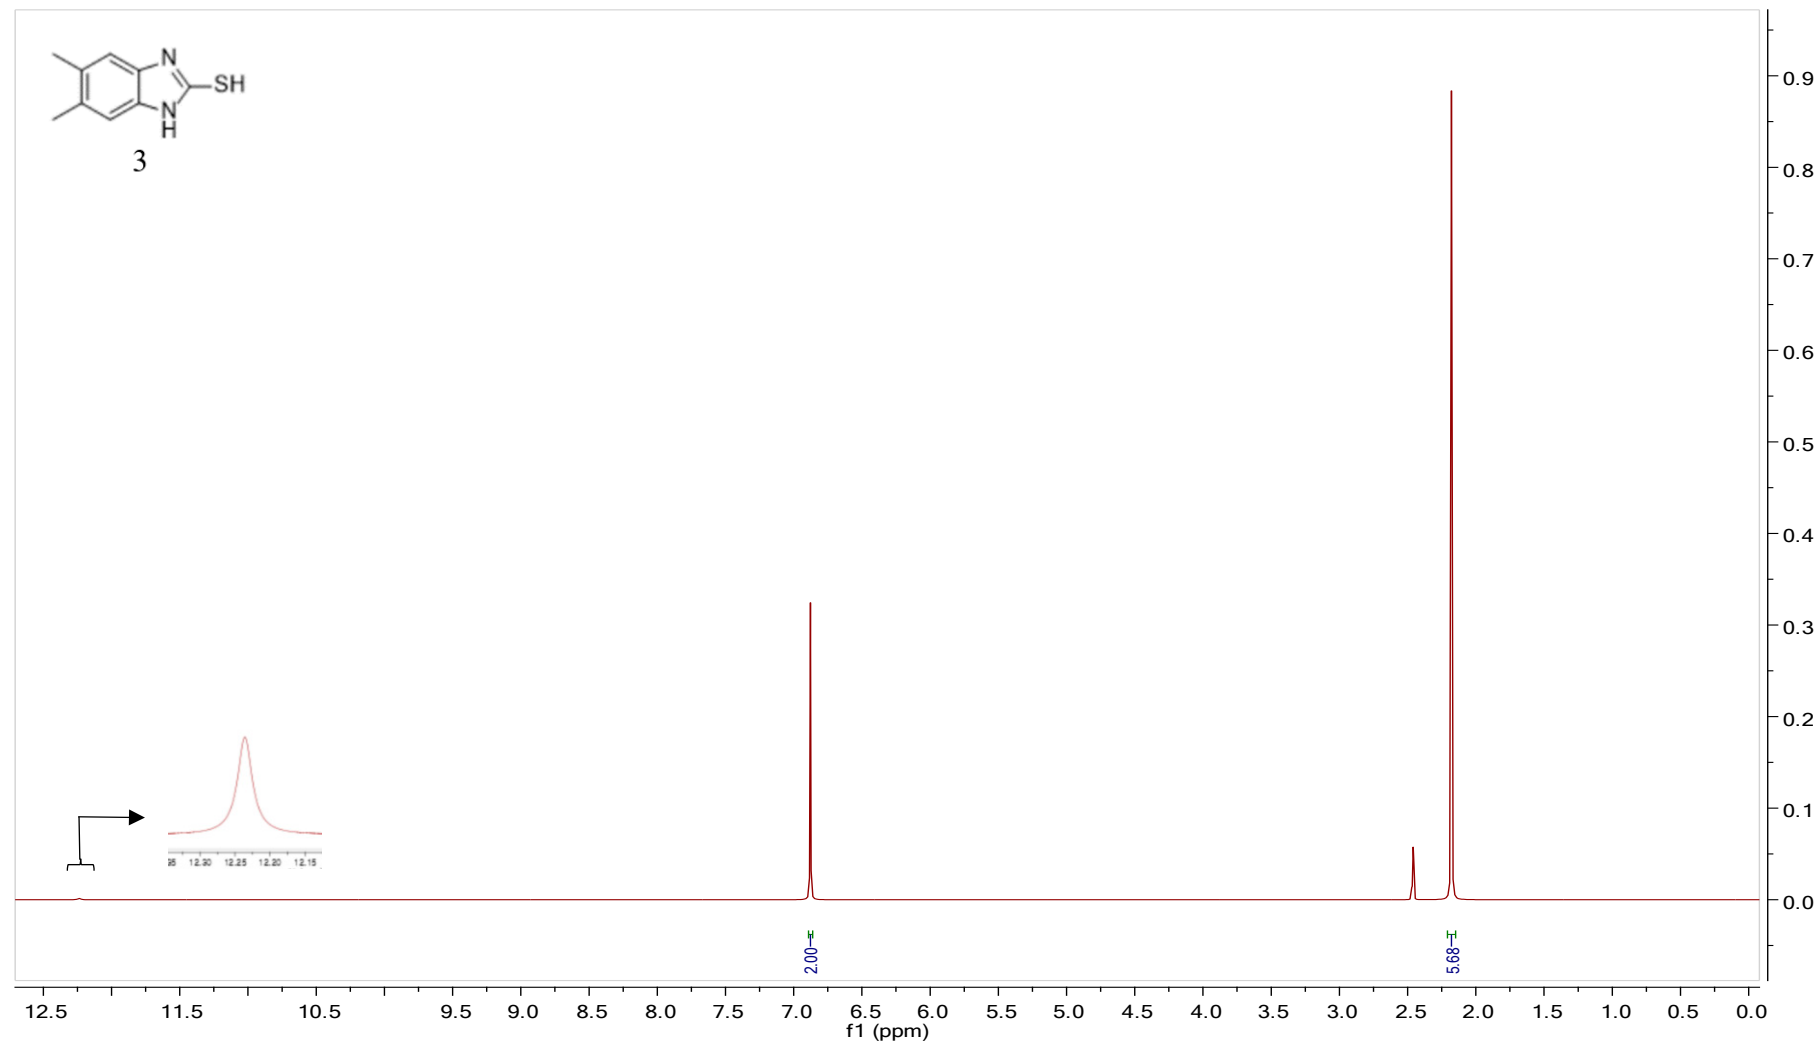

Figure S5.  $^1\text{H}$  NMR spectrum of analog **3**

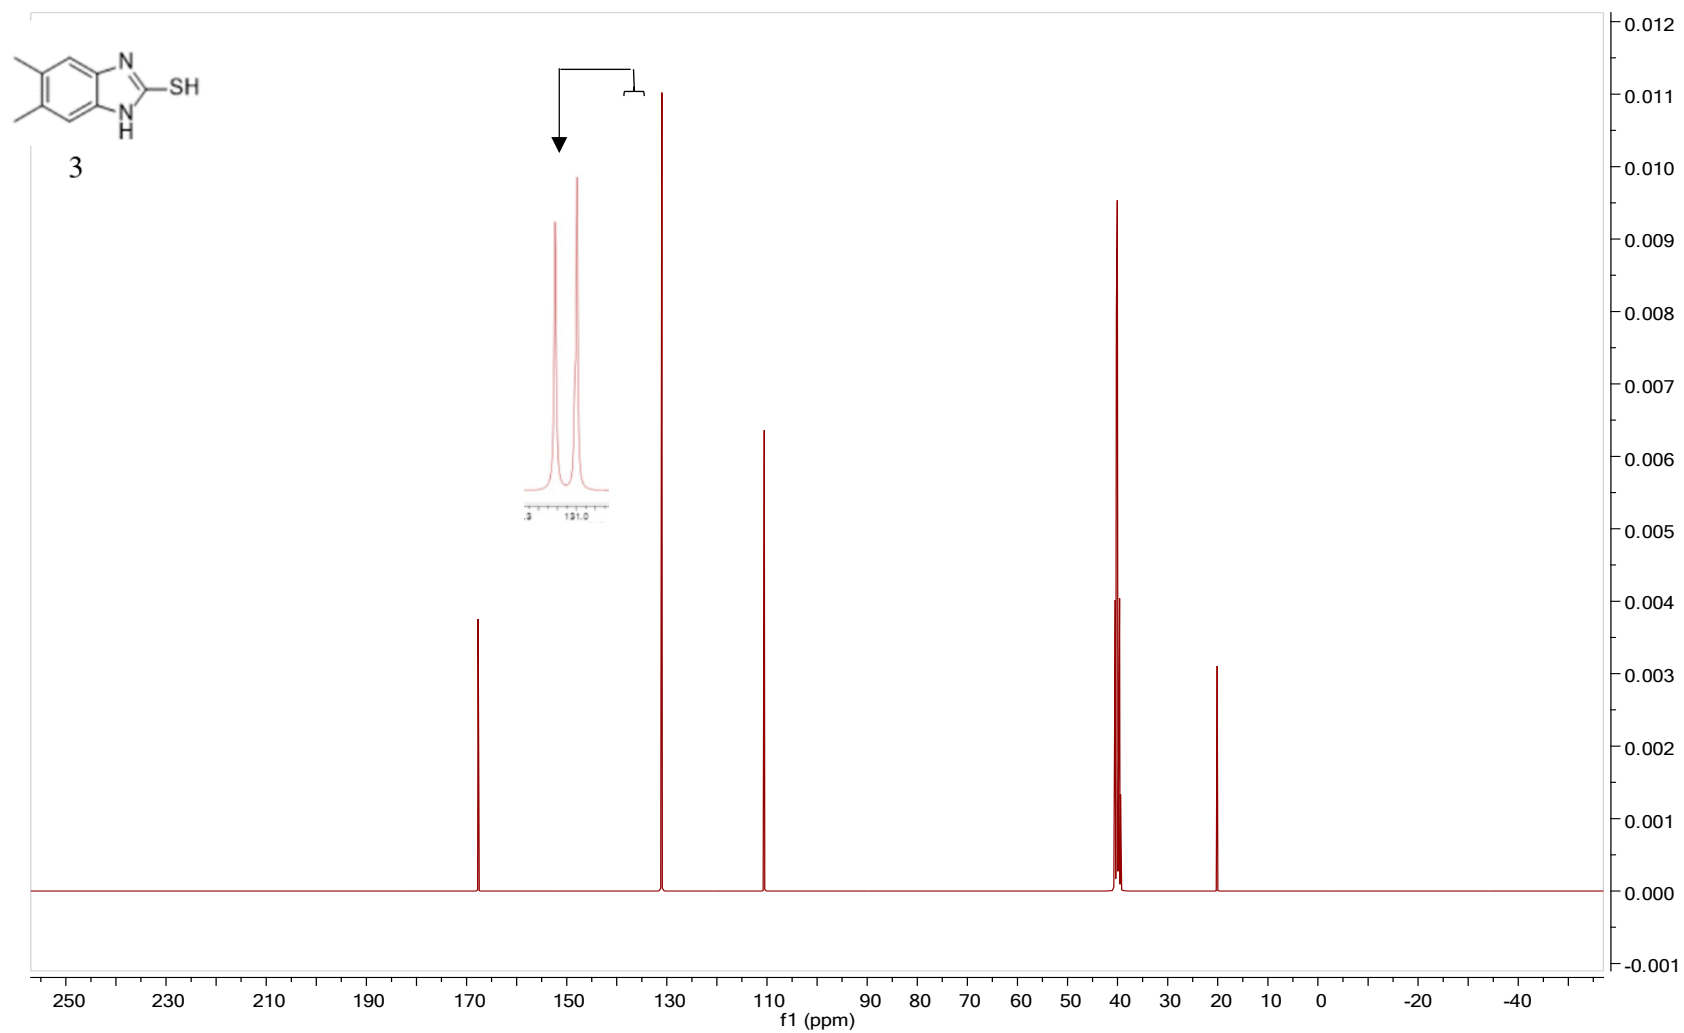

Figure S6.  $^{13}\text{C}$  NMR spectrum of analog **3**



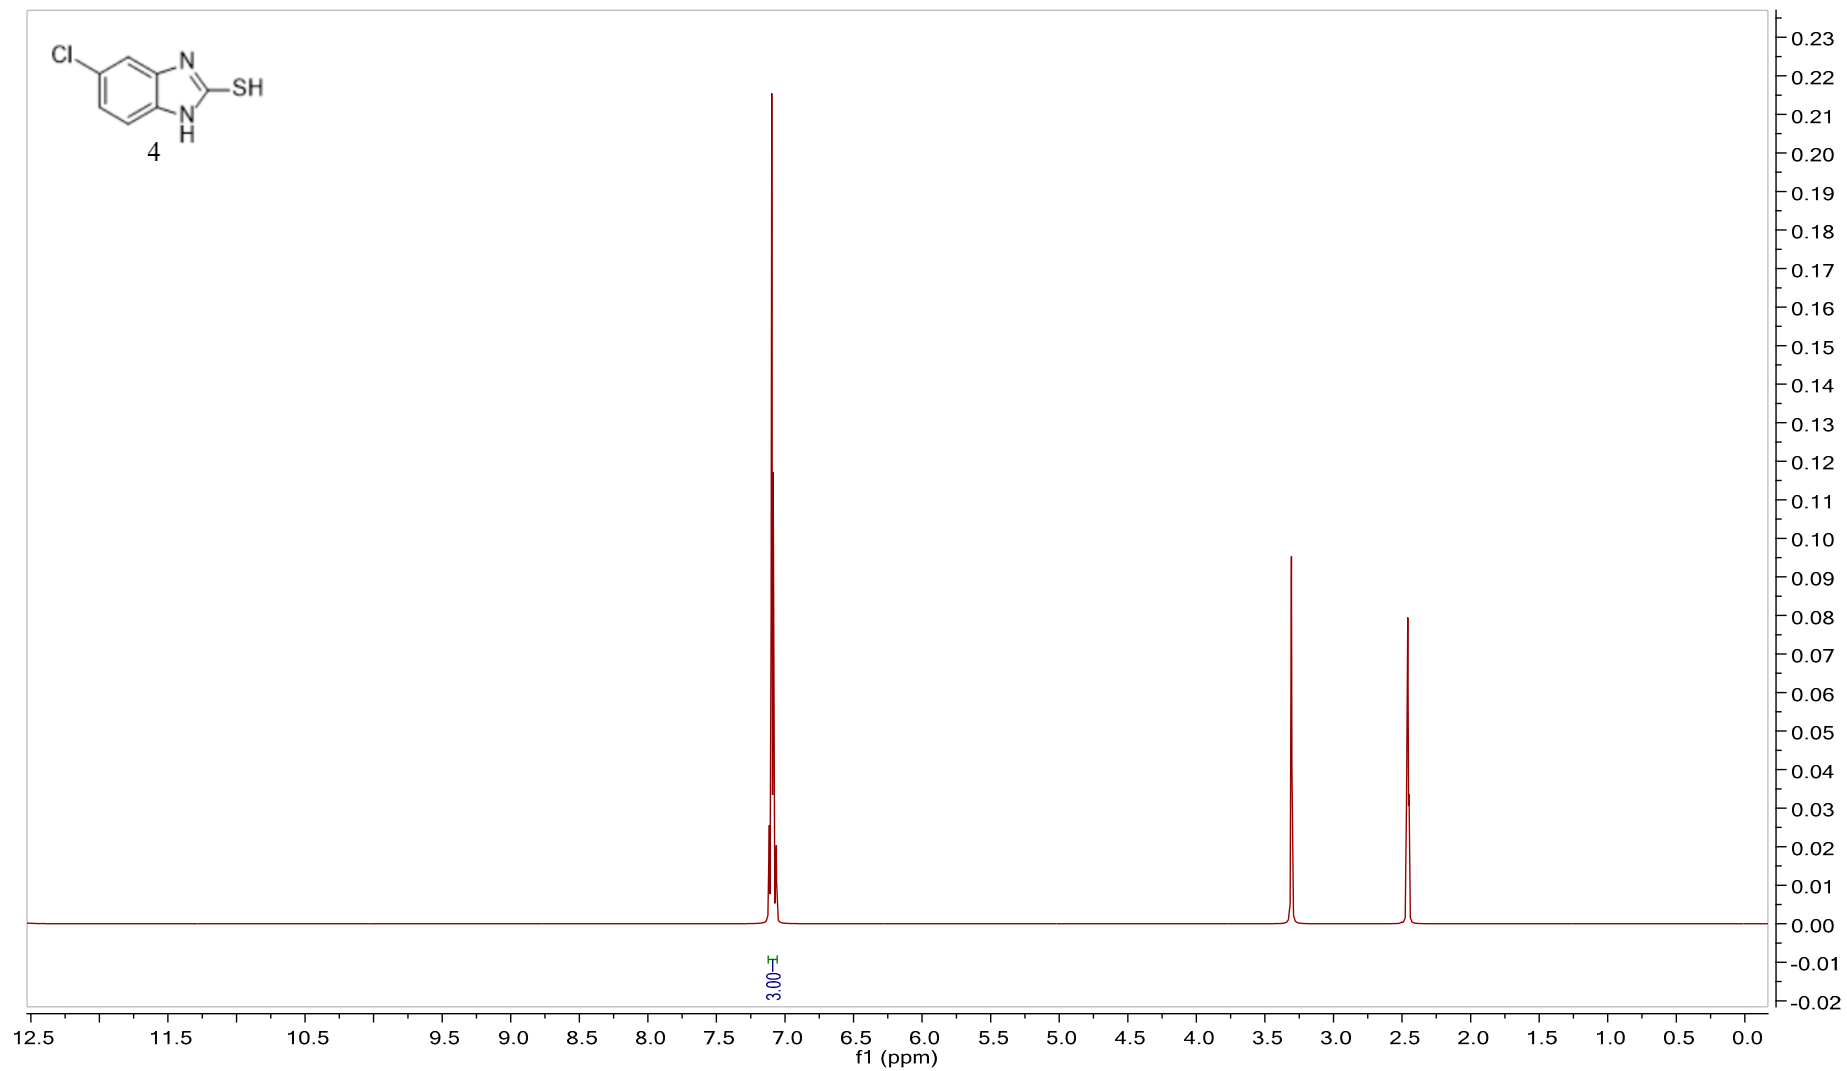

Figure S7. <sup>1</sup>H NMR spectrum of analog 4

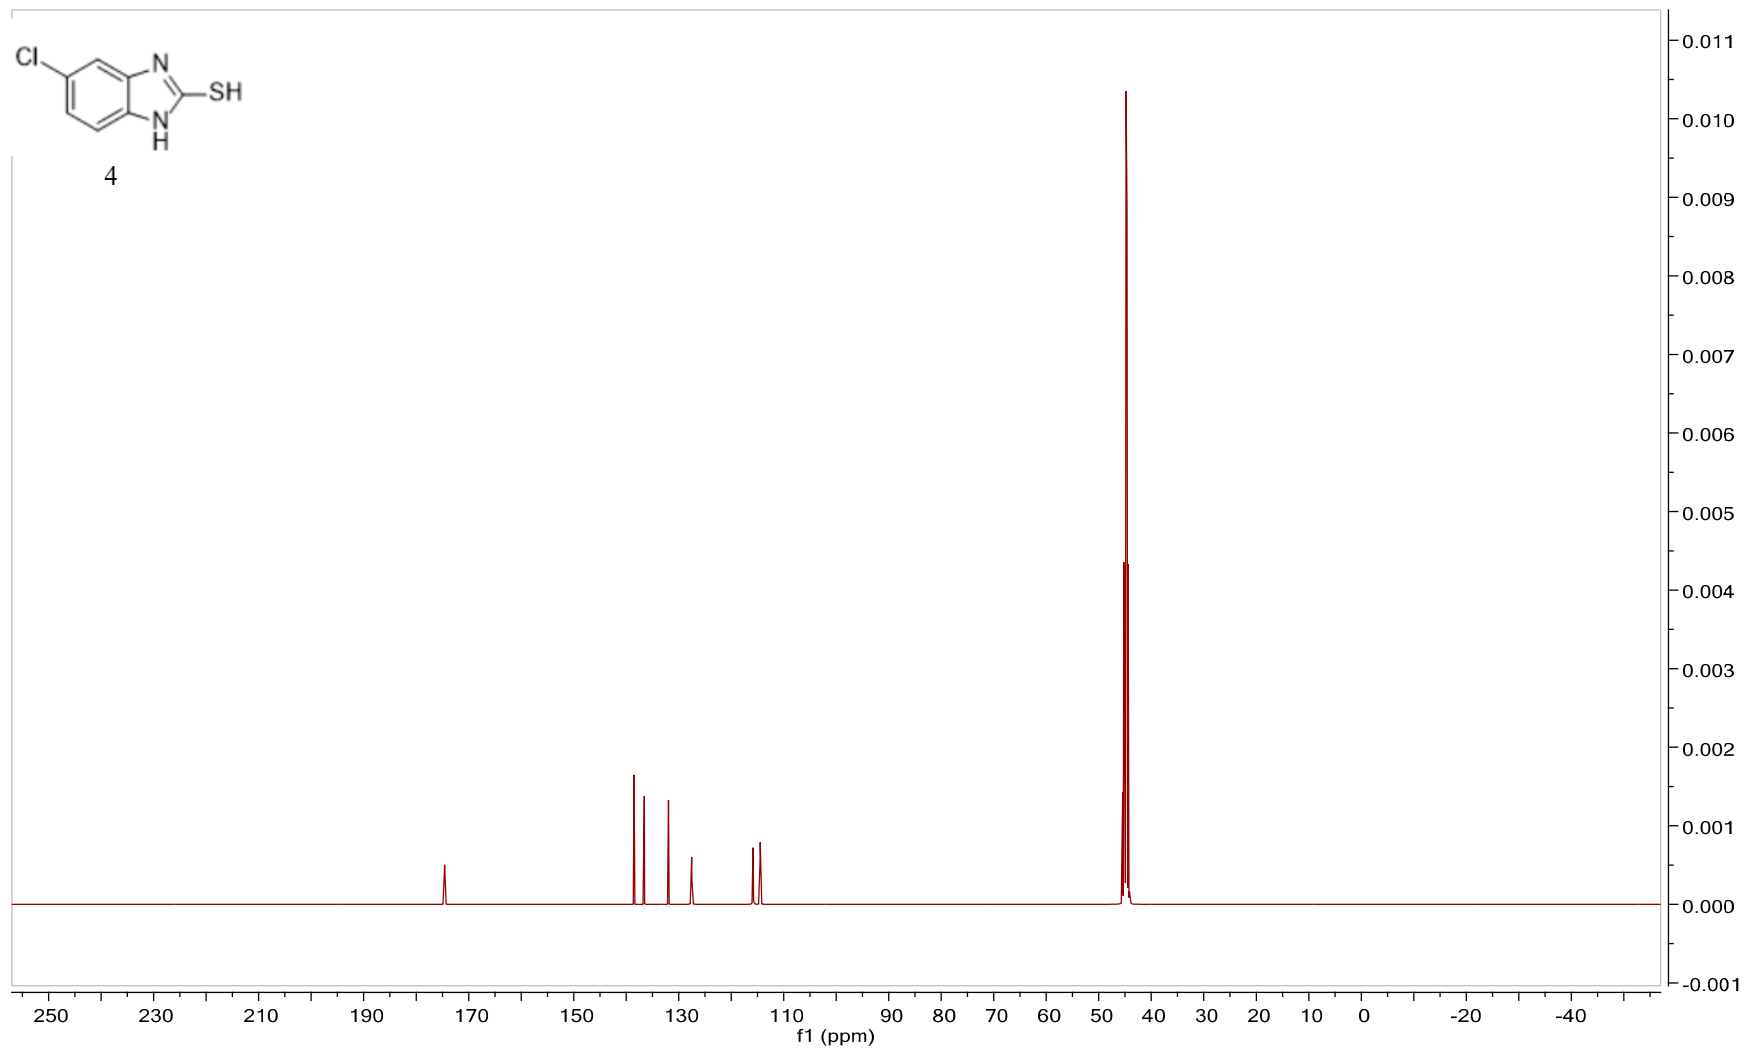

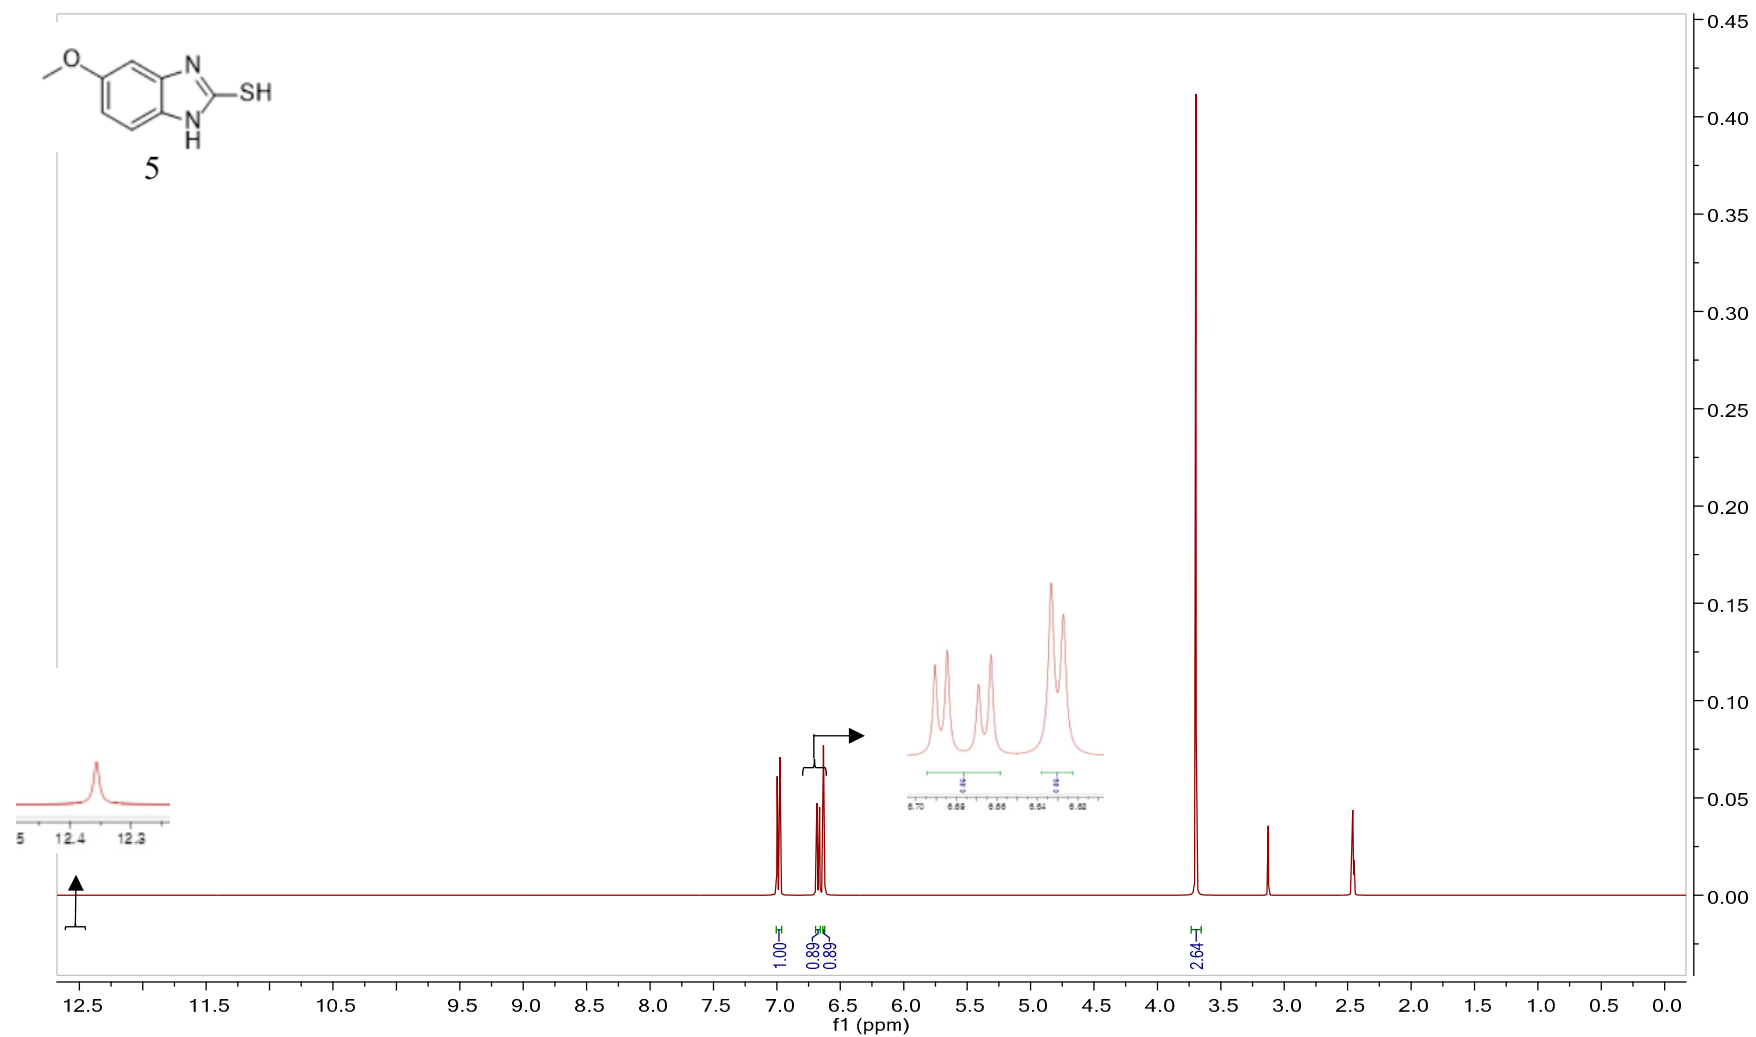

Figure S9.  $^1\text{H}$  NMR spectrum of analog **5**

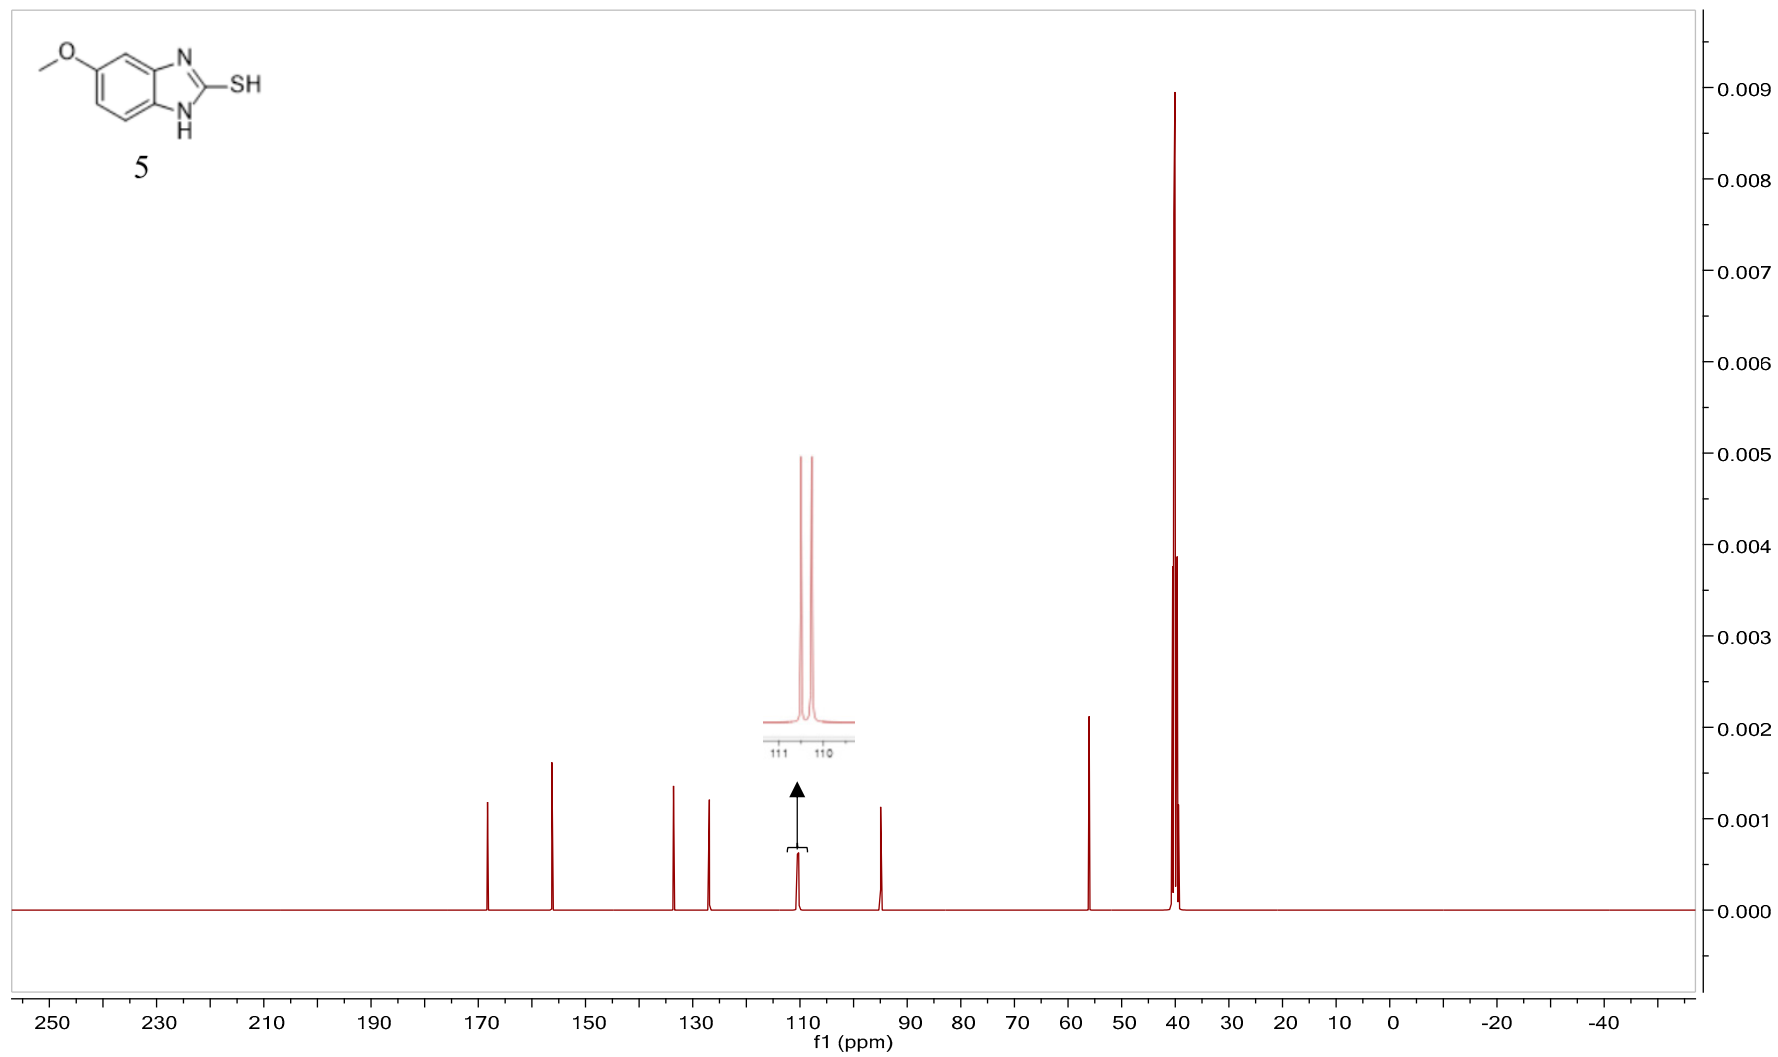

Figure S10.  $^{13}\text{C}$  NMR spectrum of analog **5**

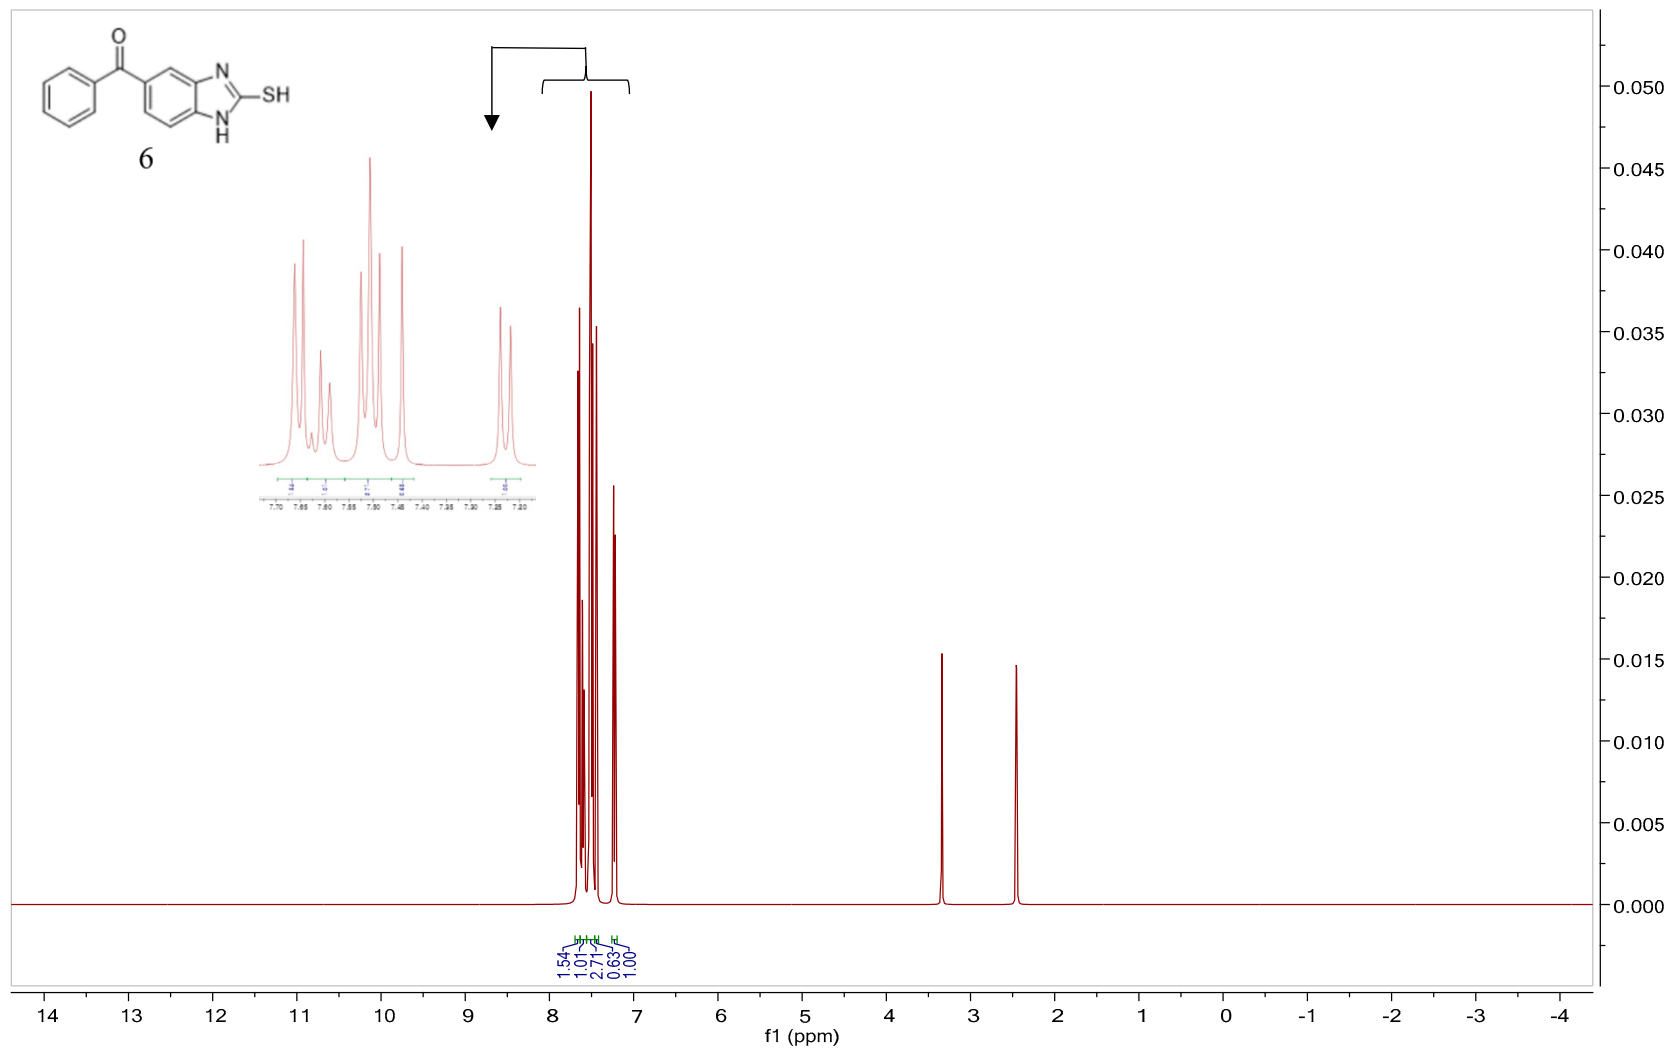

Figure S11. <sup>1</sup>H NMR spectrum of analog 6

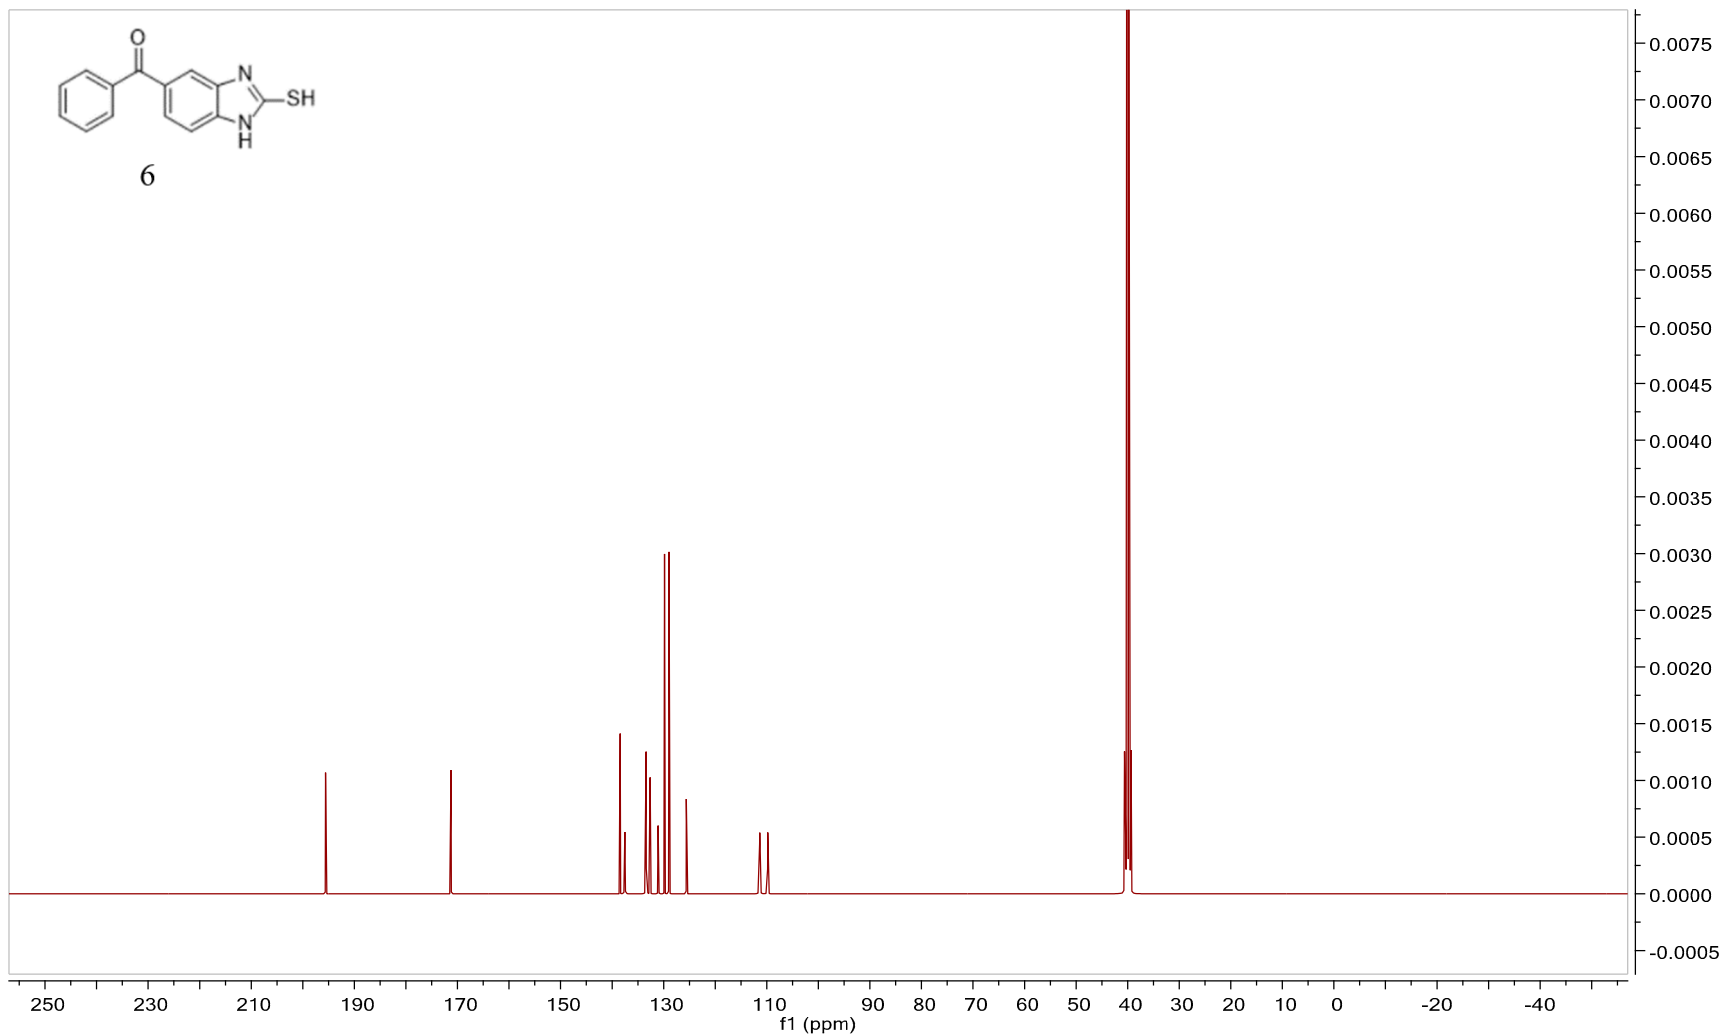

Figure S12.  $^{13}\text{C}$  NMR spectrum of analog **6**

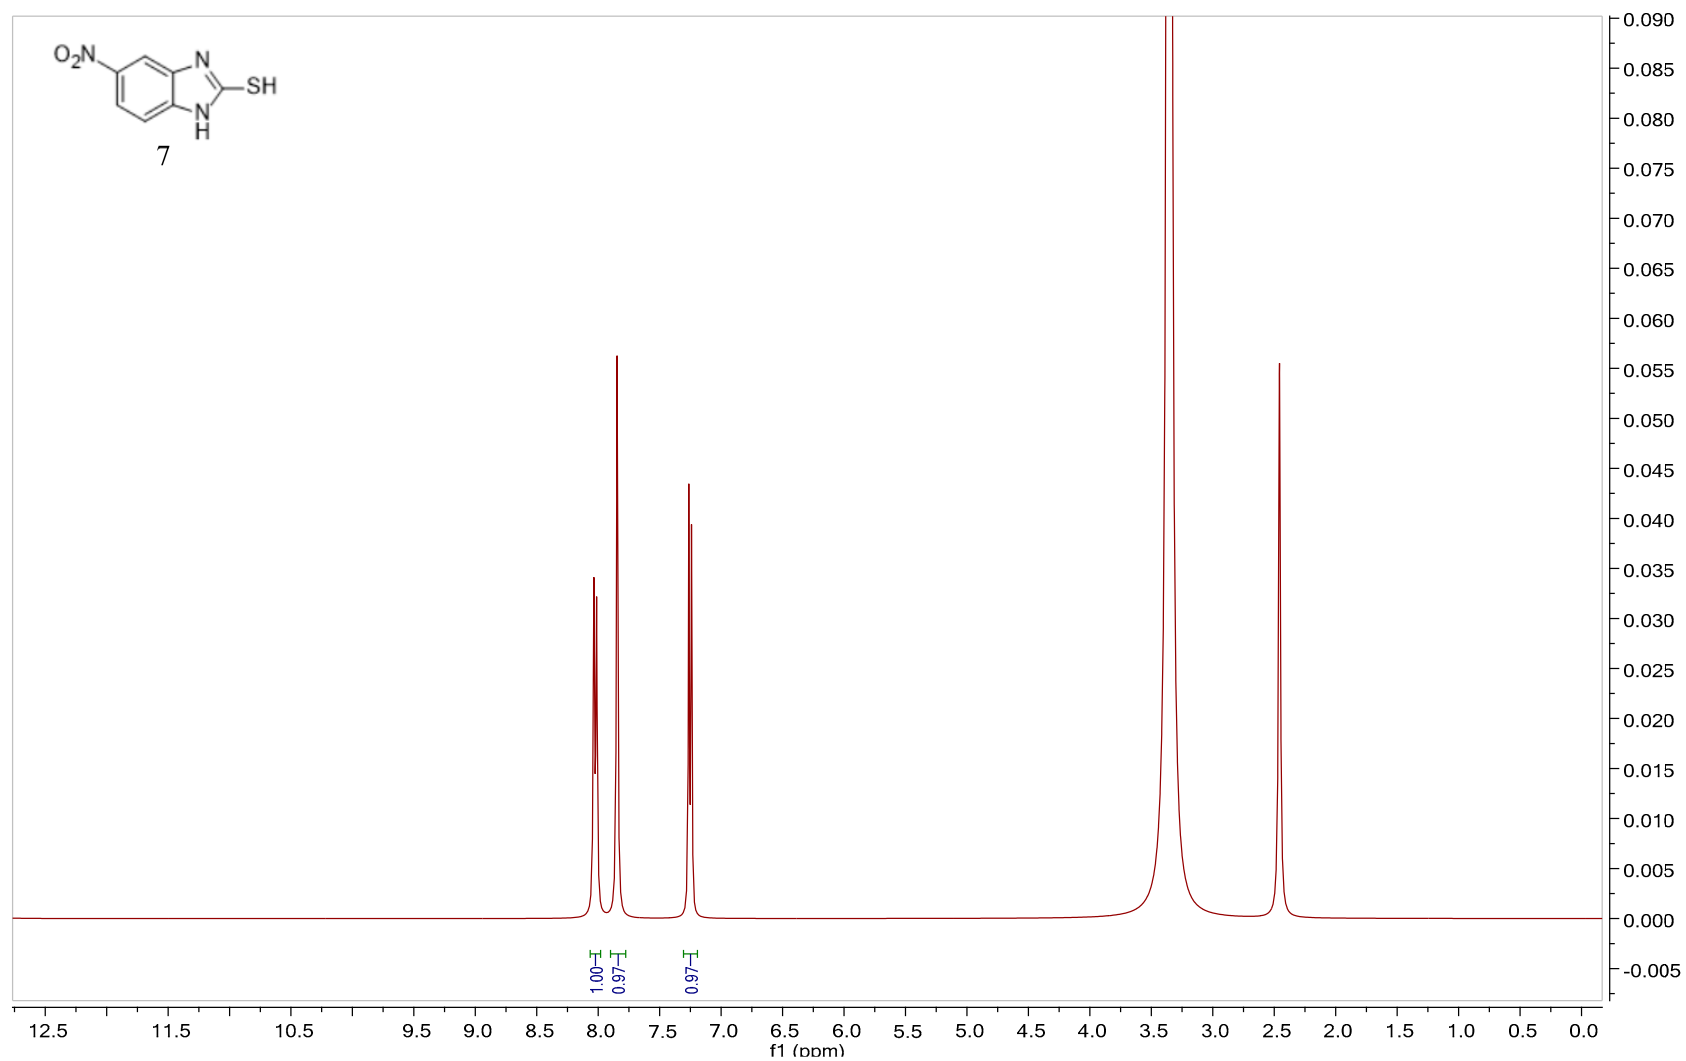

Figure S13. <sup>1</sup>H NMR spectrum of analog 7

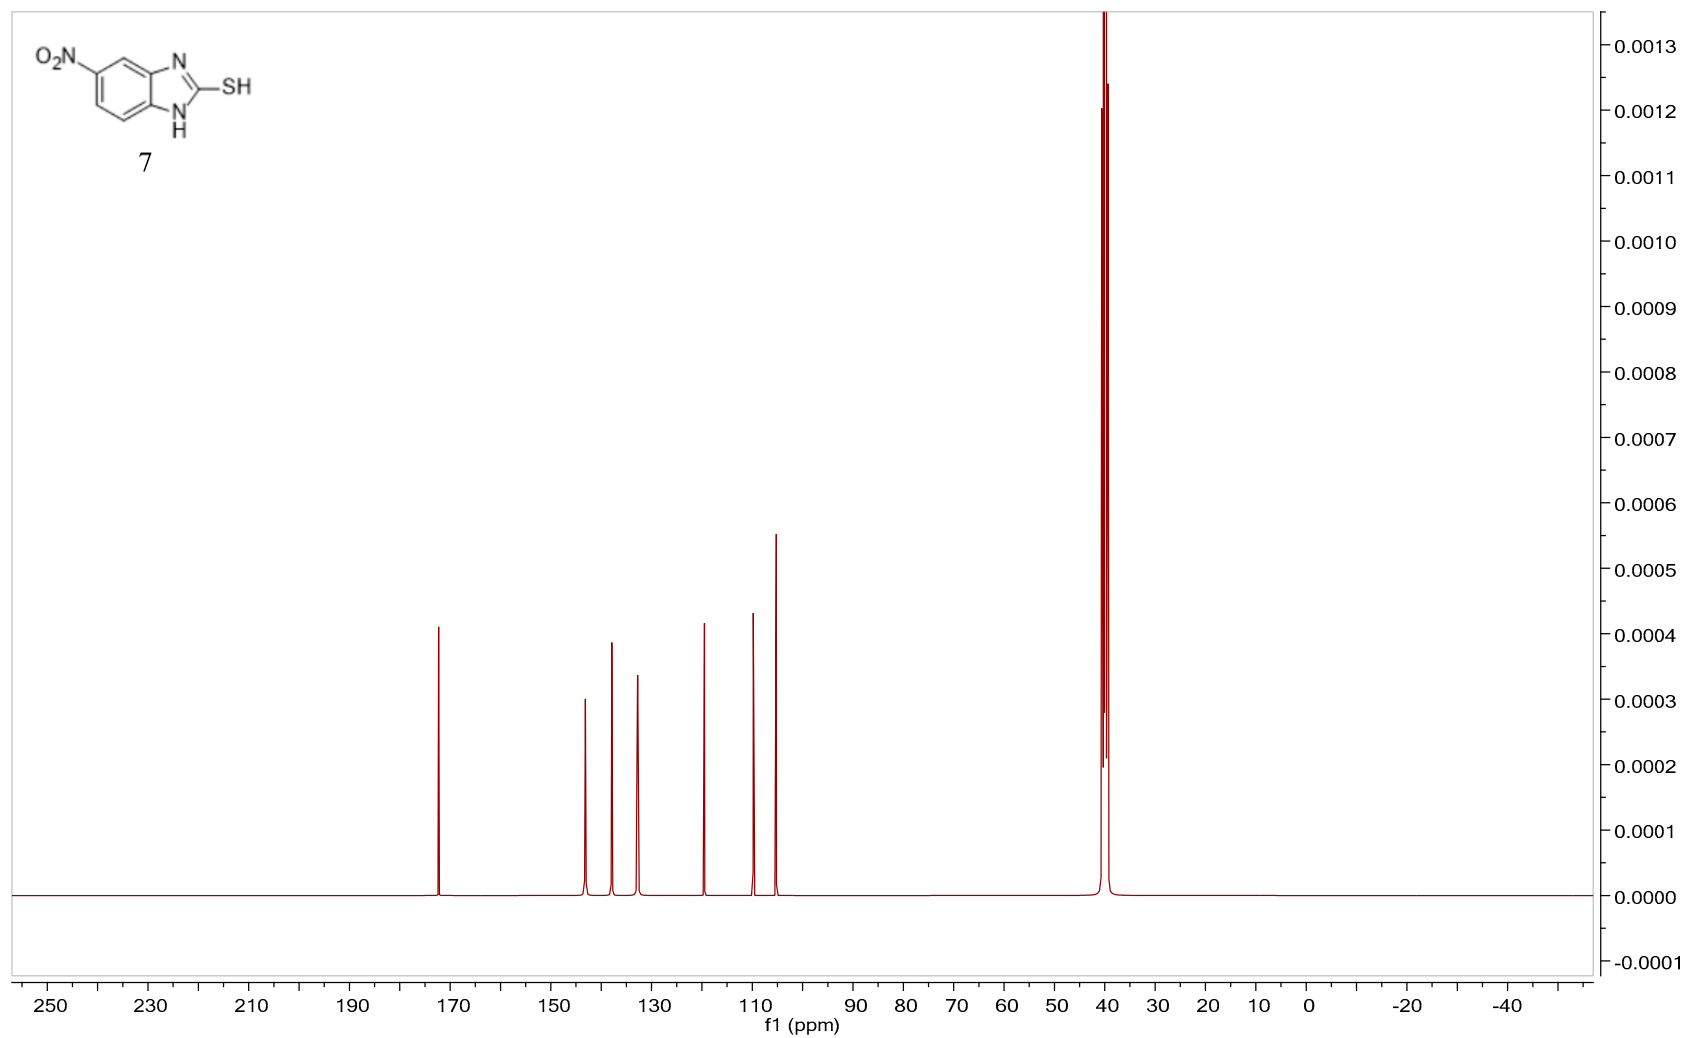

Figure S14.  $^{13}\text{C}$  NMR spectrum of analog 7



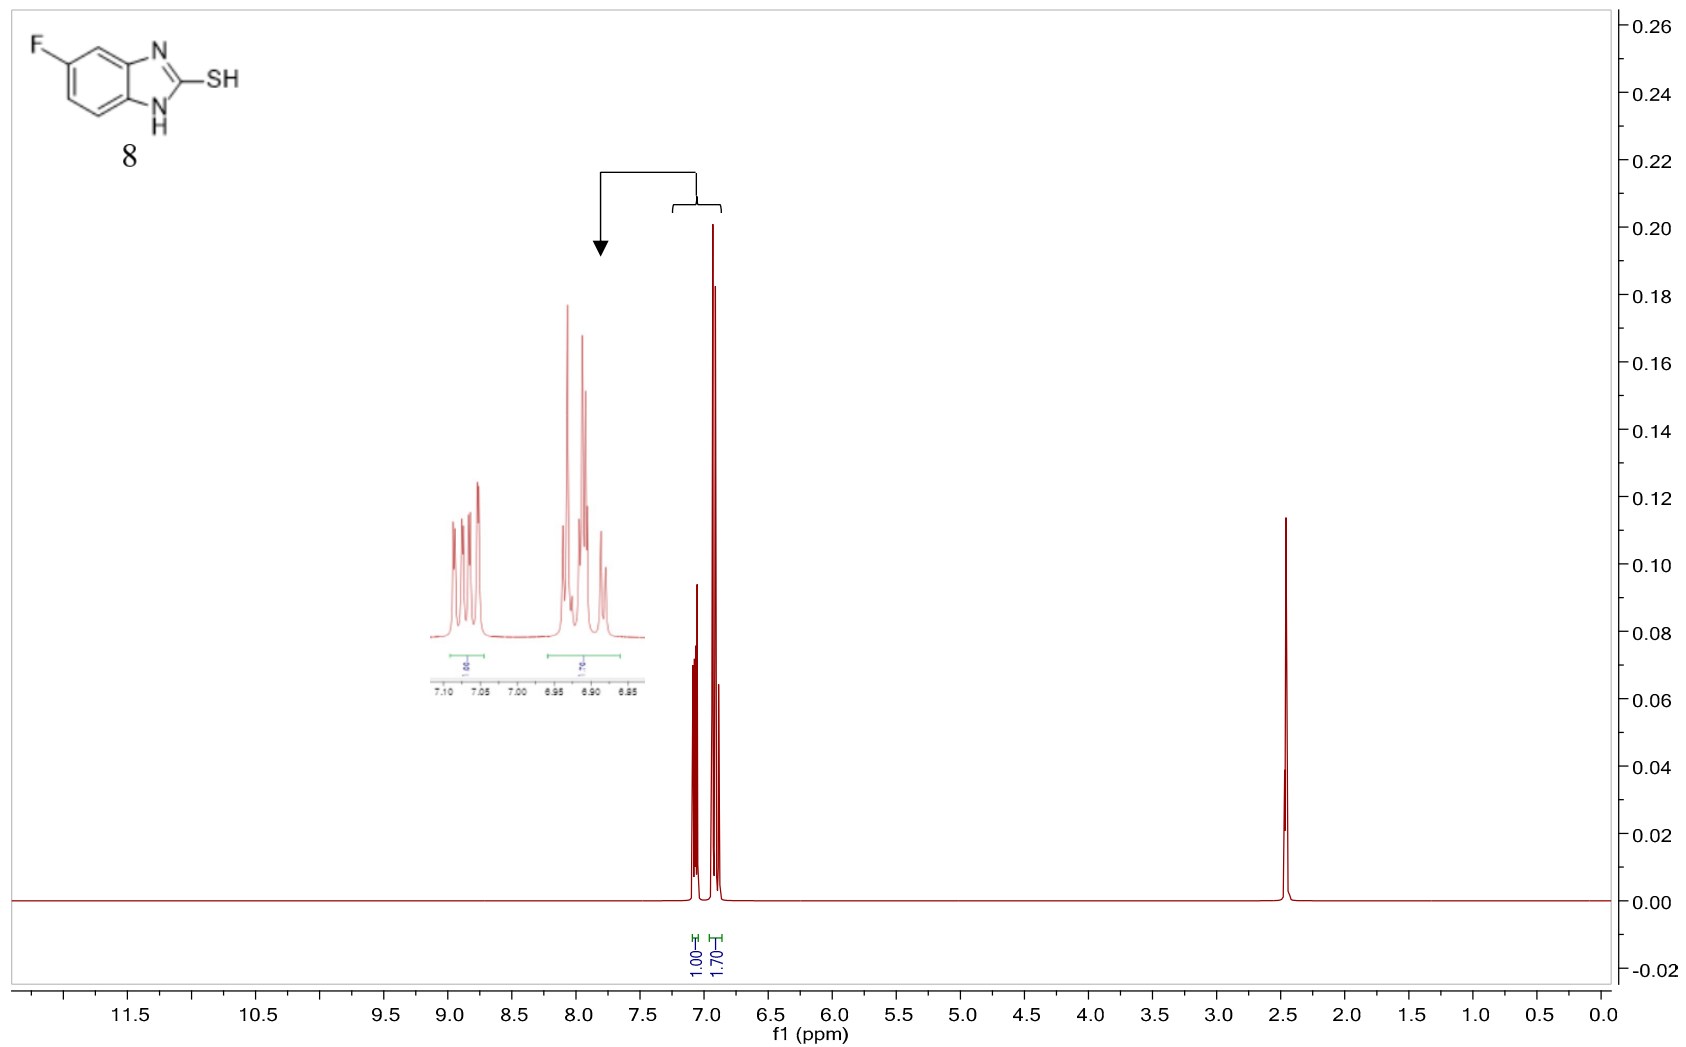

Figure S15. <sup>1</sup>H NMR spectrum of analog **8**

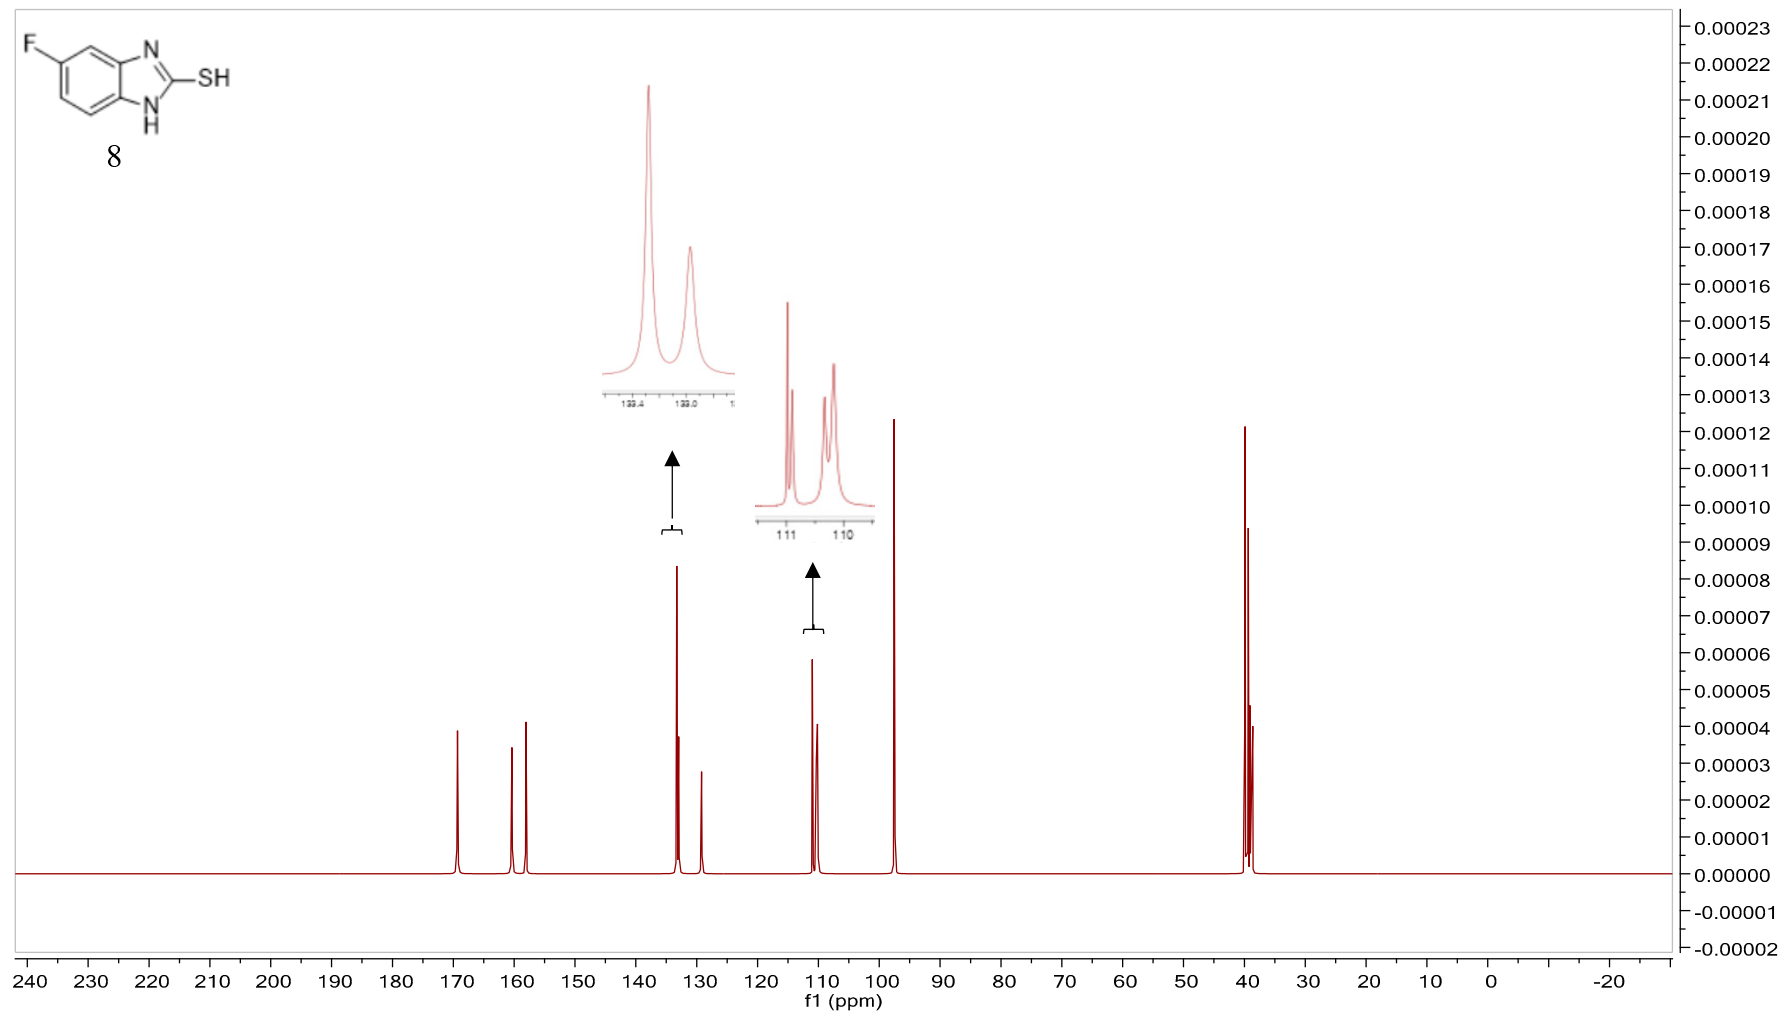

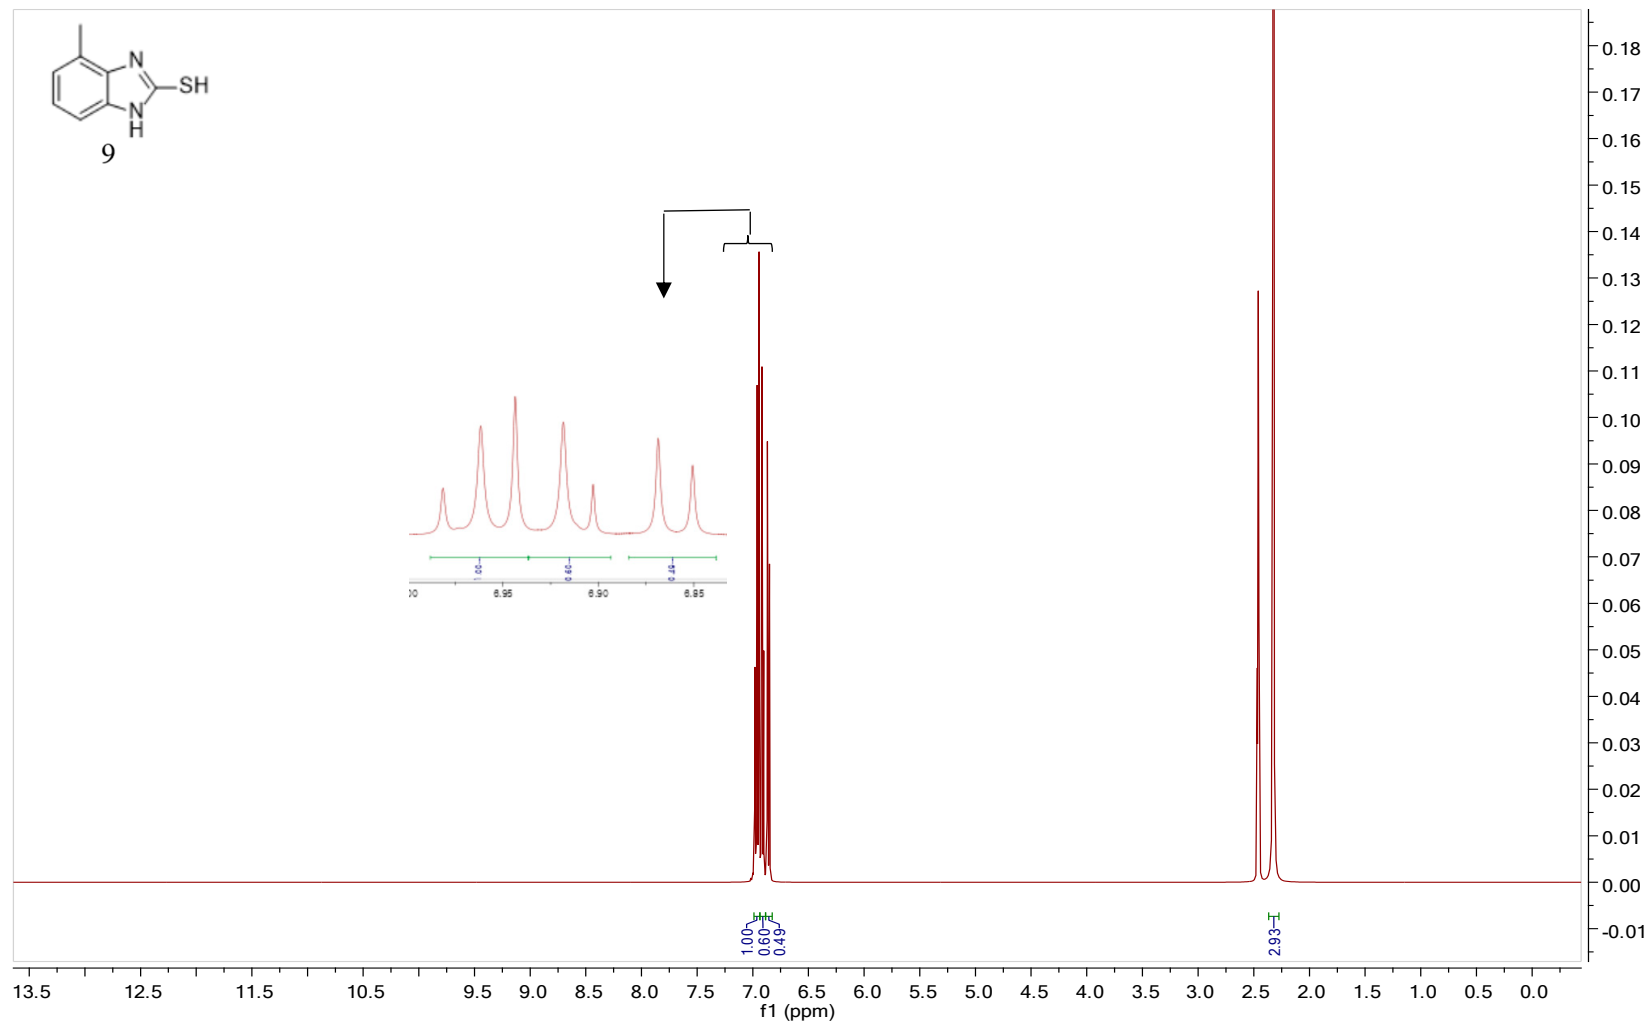

Figure S17. <sup>1</sup>H NMR spectrum of analog 9

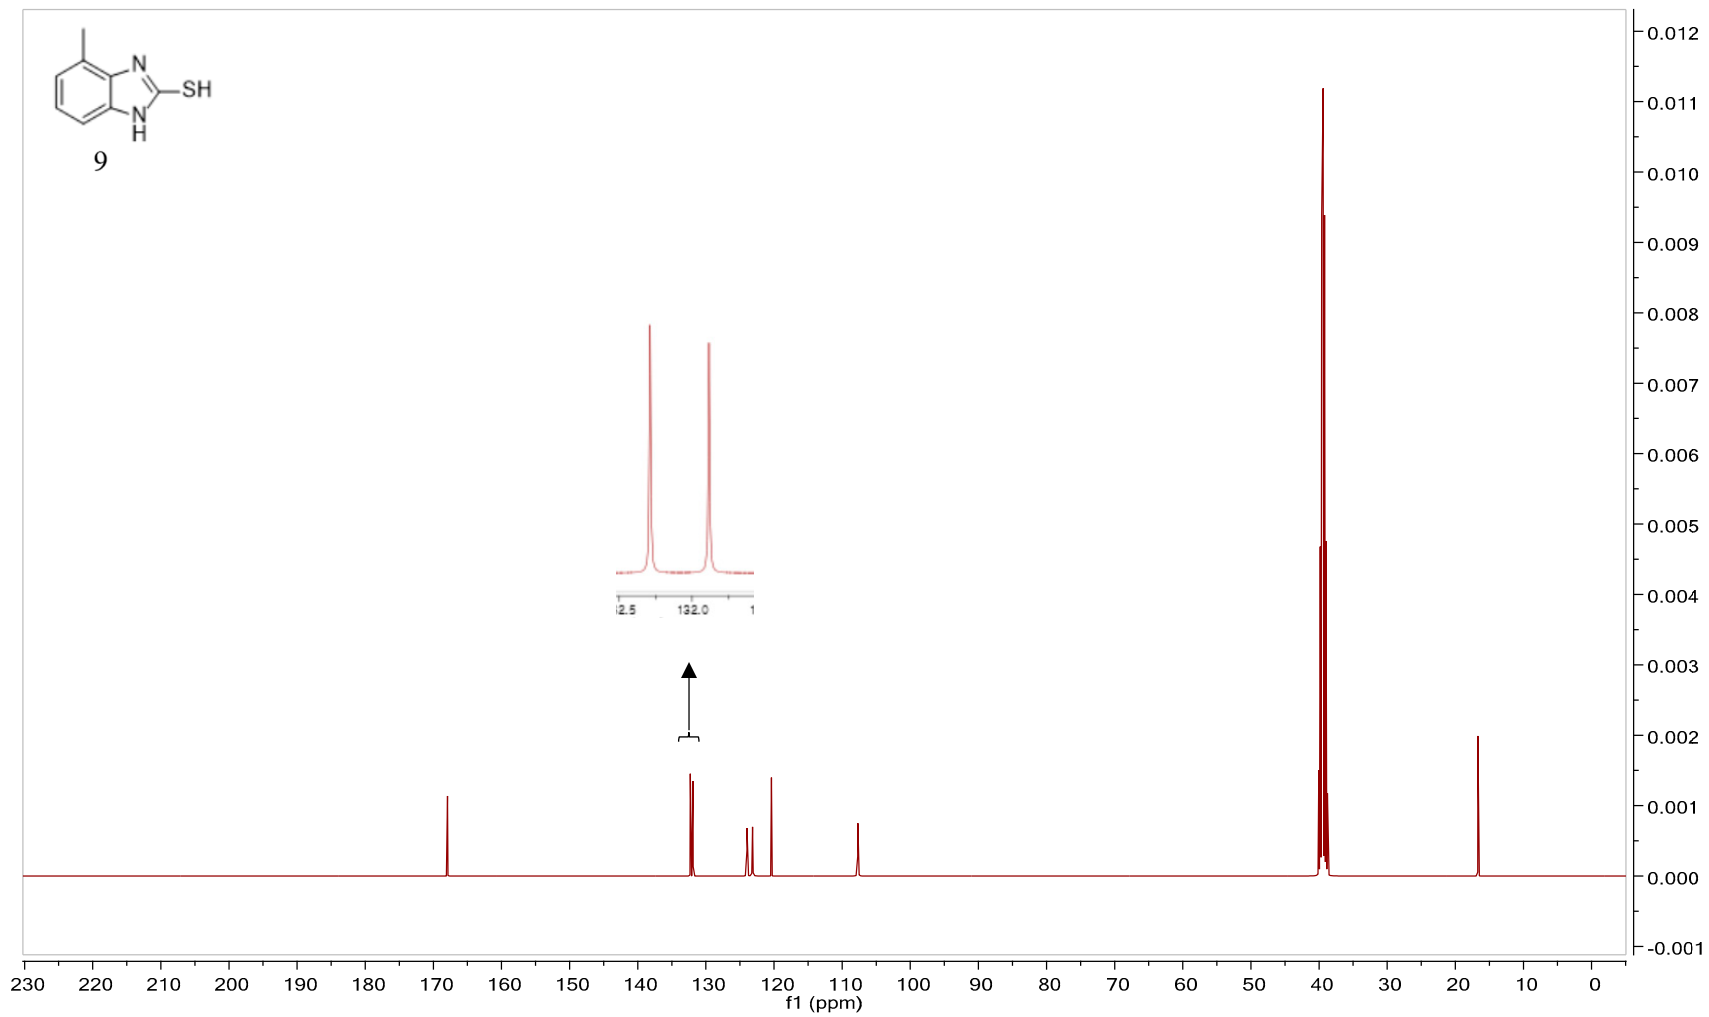

Figure S18.  $^{13}\text{C}$  NMR spectrum of analog **9**

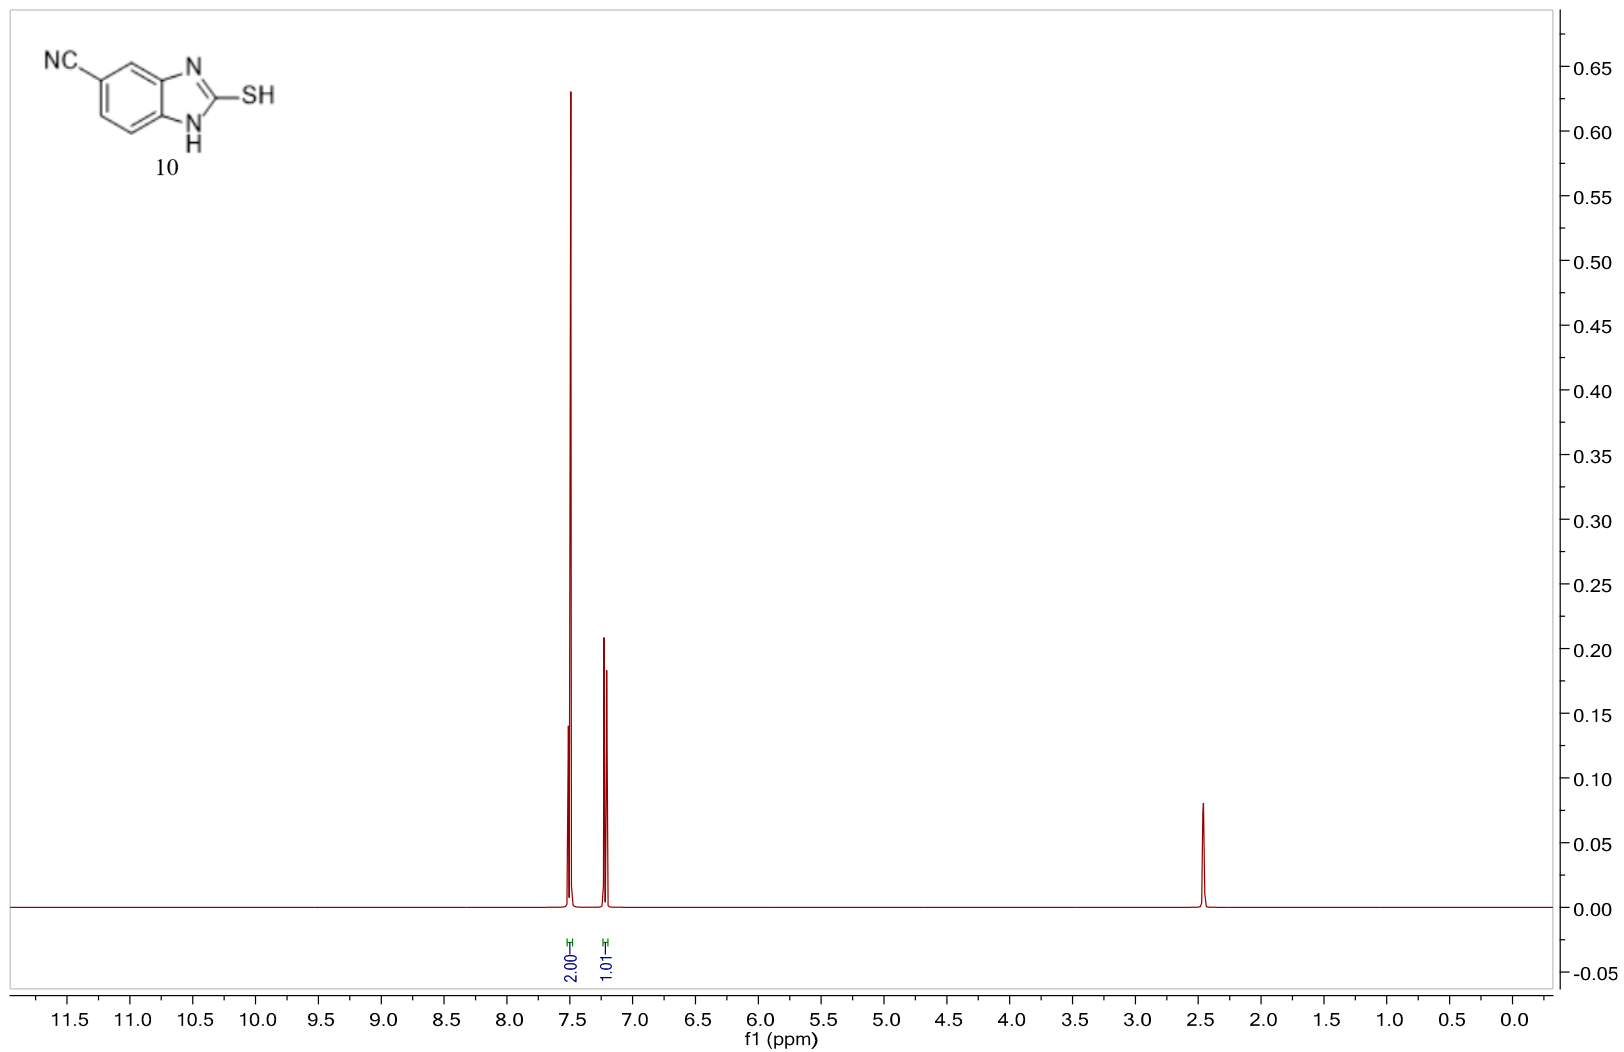

Figure S19. <sup>1</sup>H NMR spectrum of analog **10**

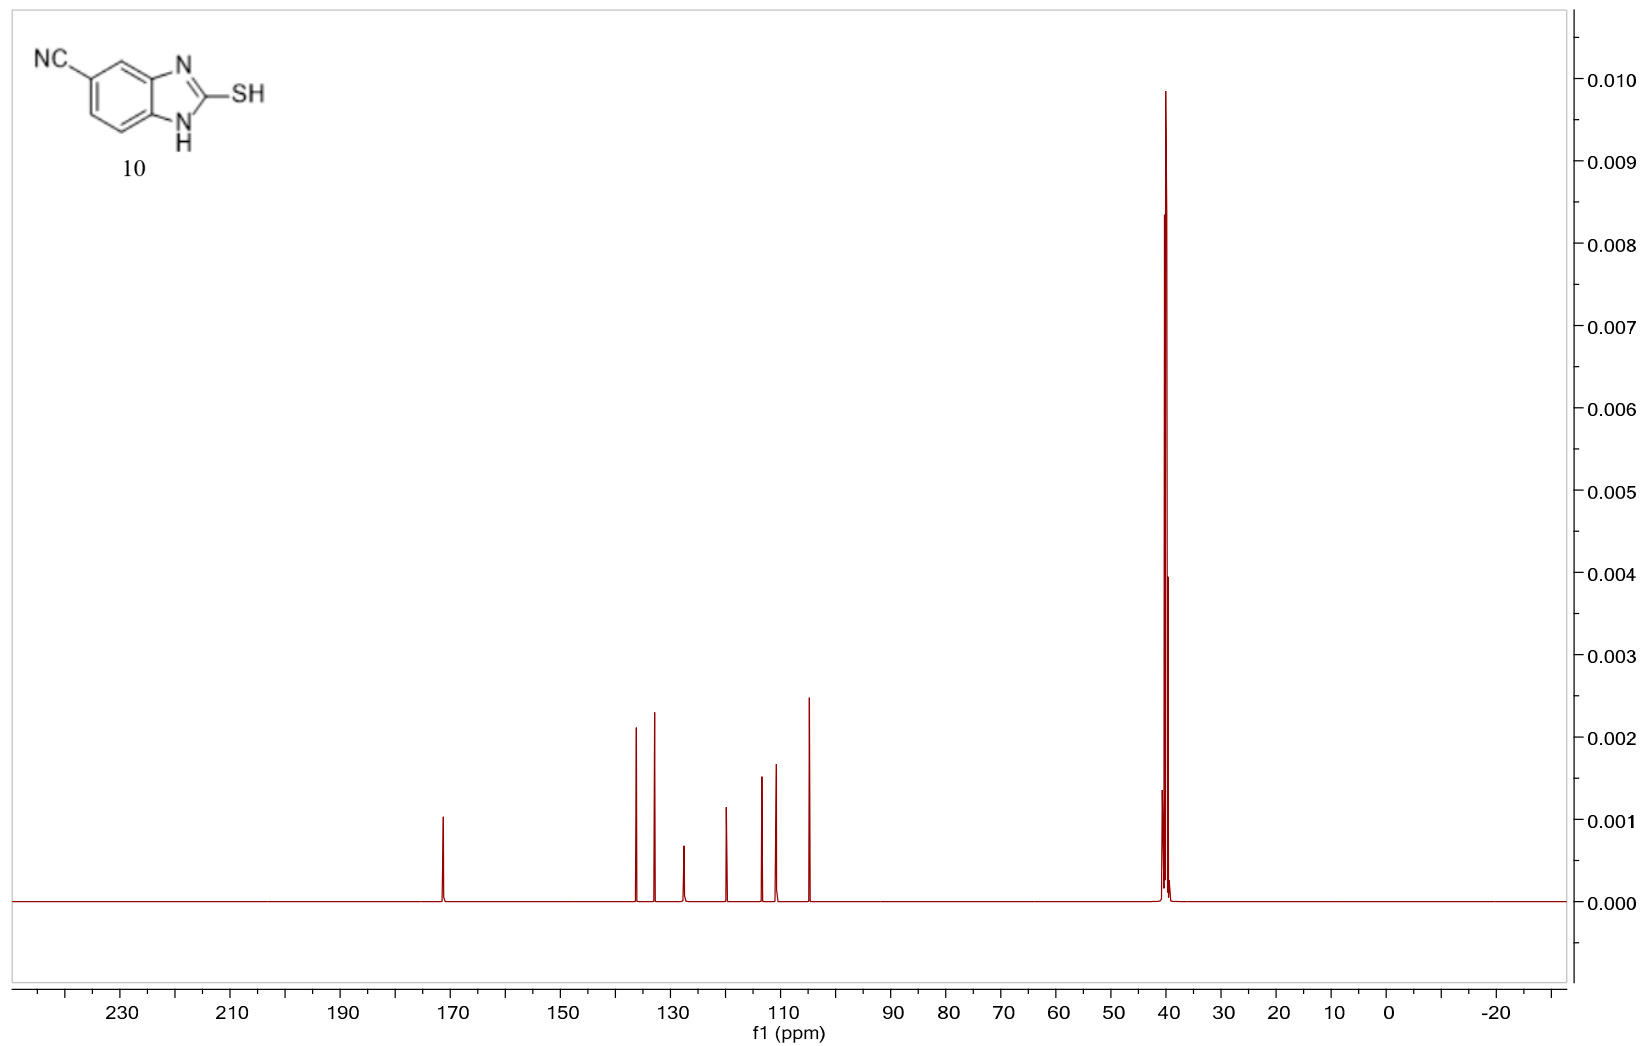

Figure S20.  $^{13}\text{C}$  NMR spectrum of analog **10**

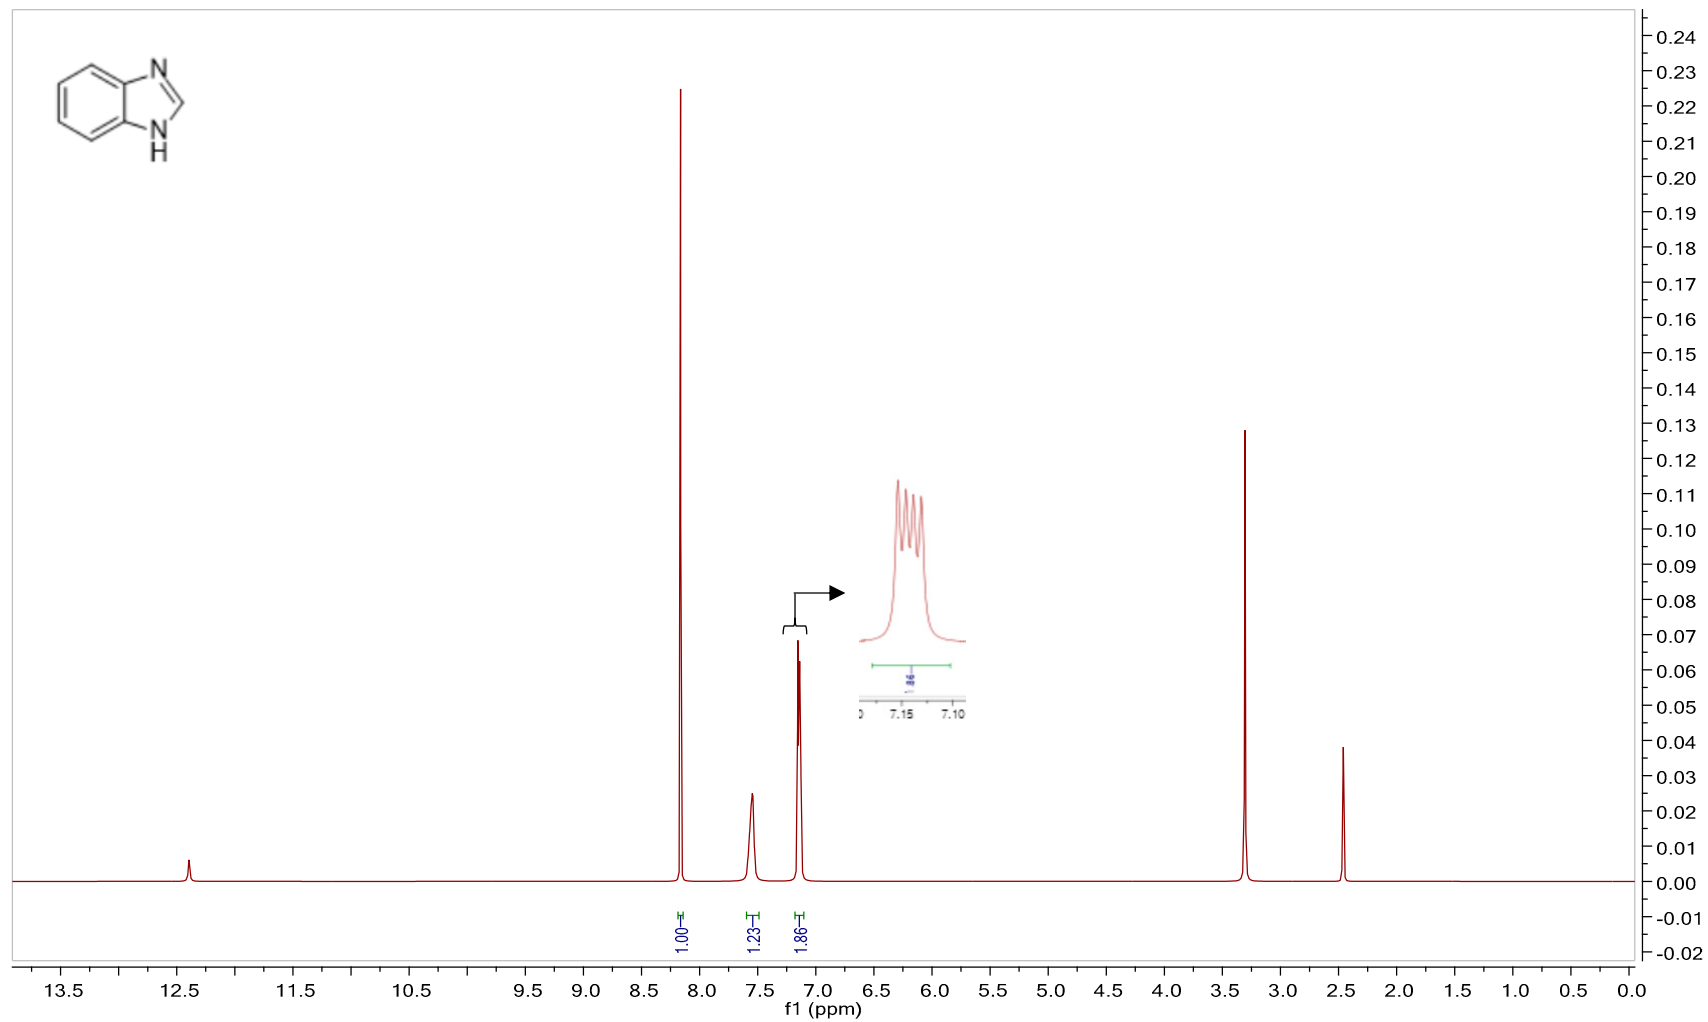

Figure S21.  $^1\text{H}$  NMR spectrum of analog 1H-benzo[d]imidazole

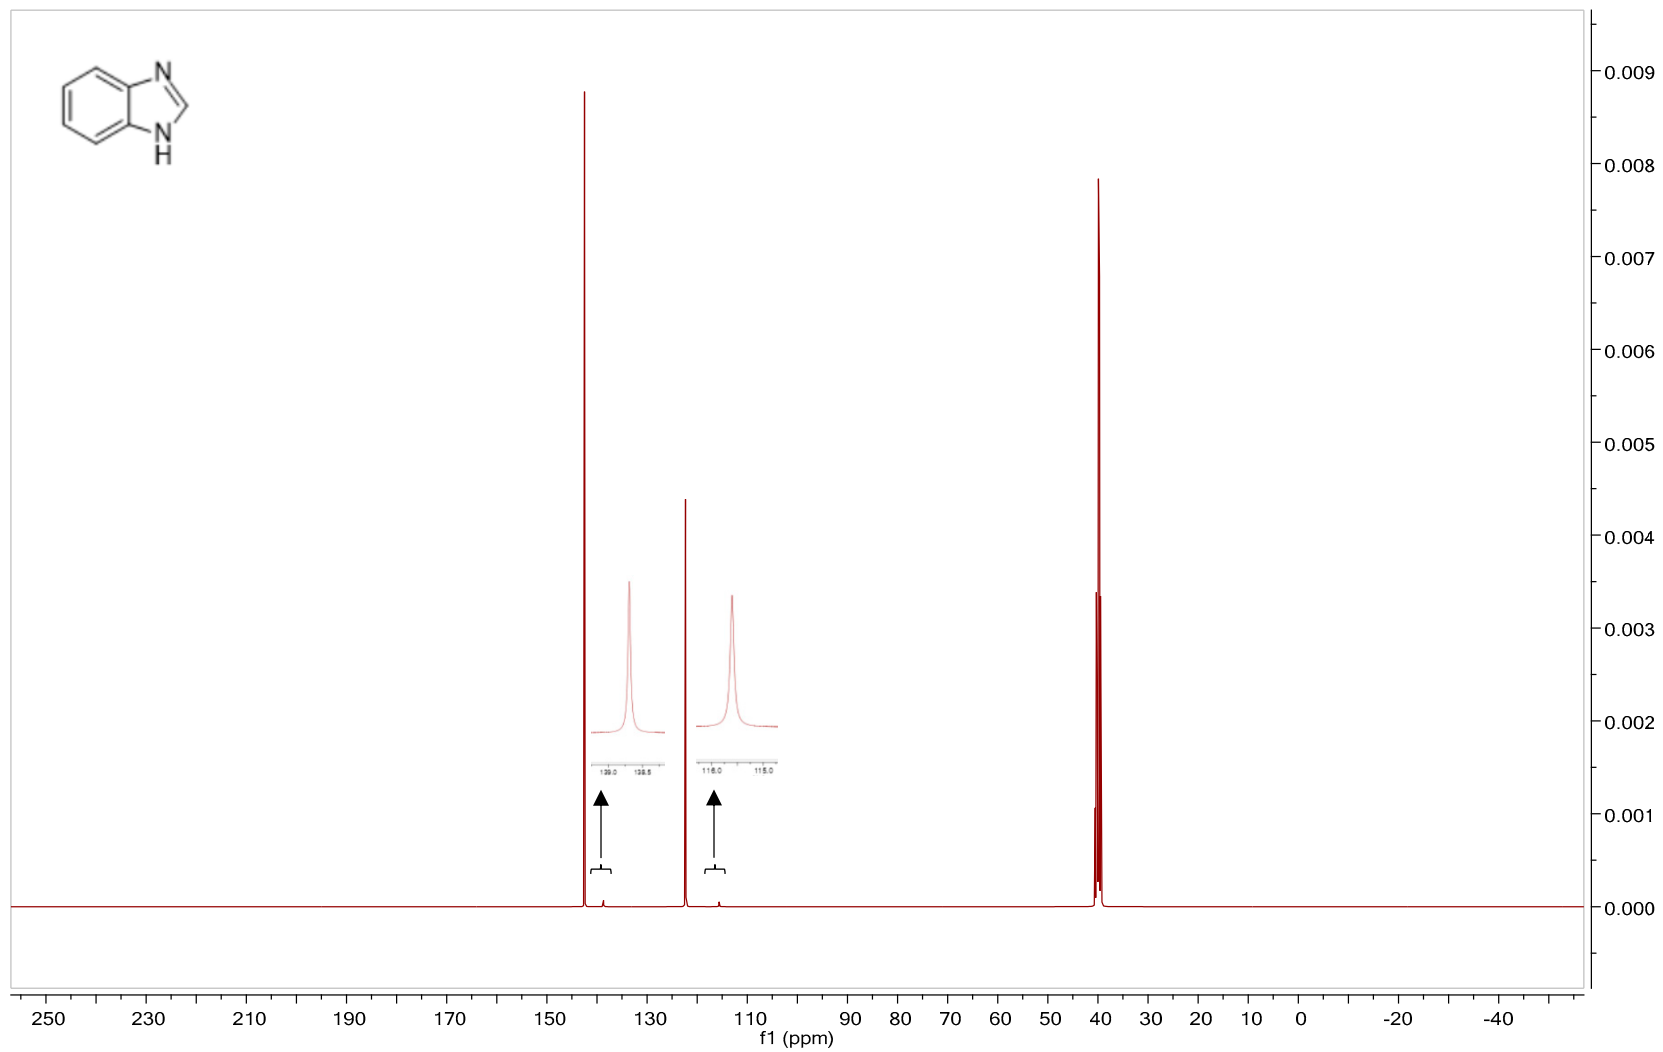

Figure S22.  $^{13}\text{C}$  NMR spectrum of analog 1H-benzo[d]imidazole



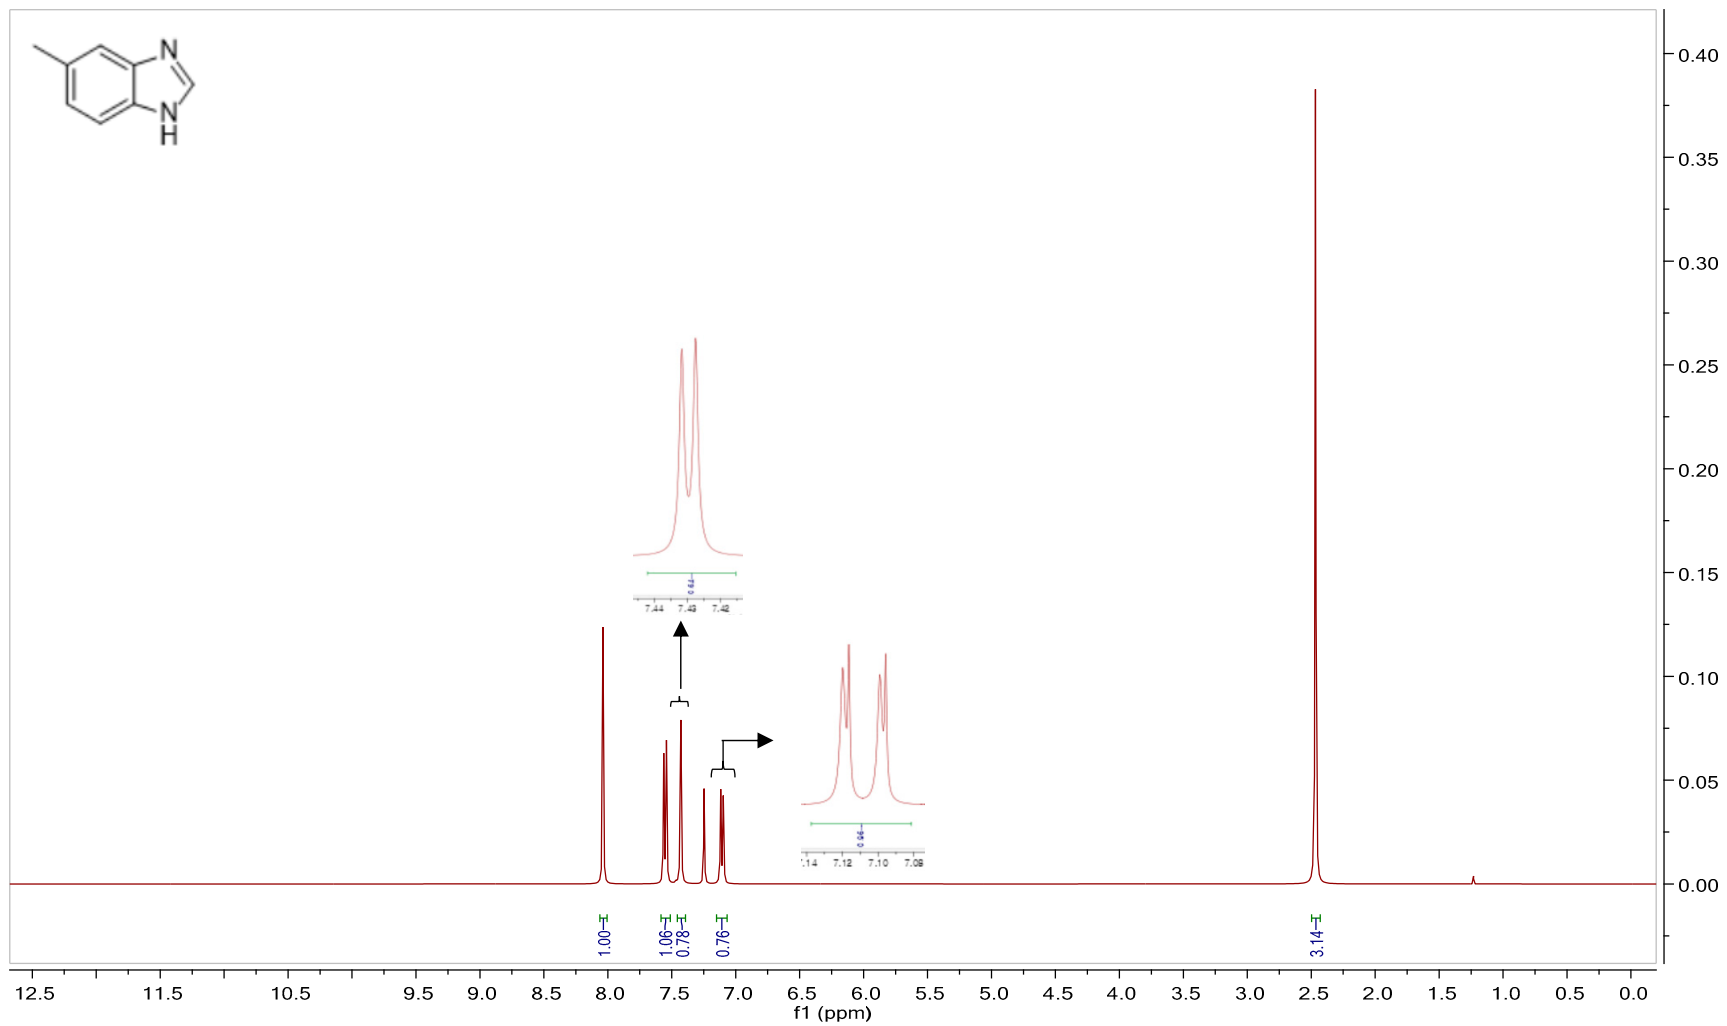

Figure S23.  $^1\text{H}$  NMR spectrum of analog 5-methyl-1H-benzo[d]imidazole

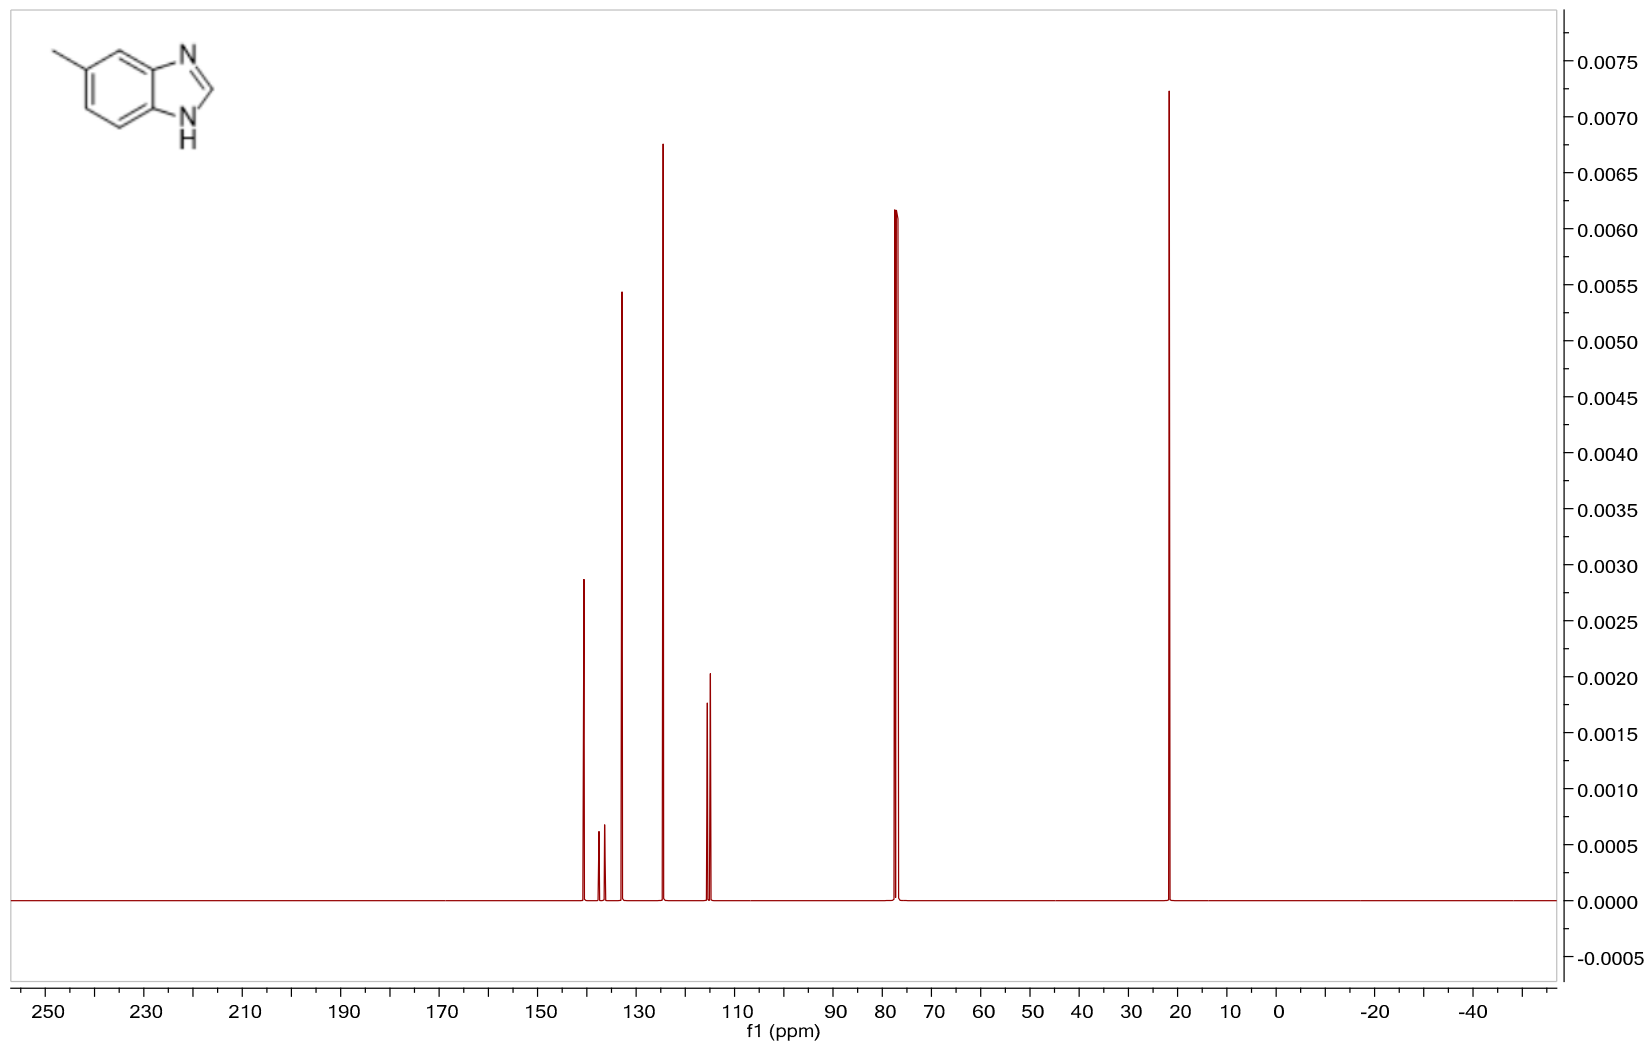

Figure S24.  $^{13}\text{C}$  NMR spectrum of analog 5-methyl-1*H*-benzo[*d*]imidazole

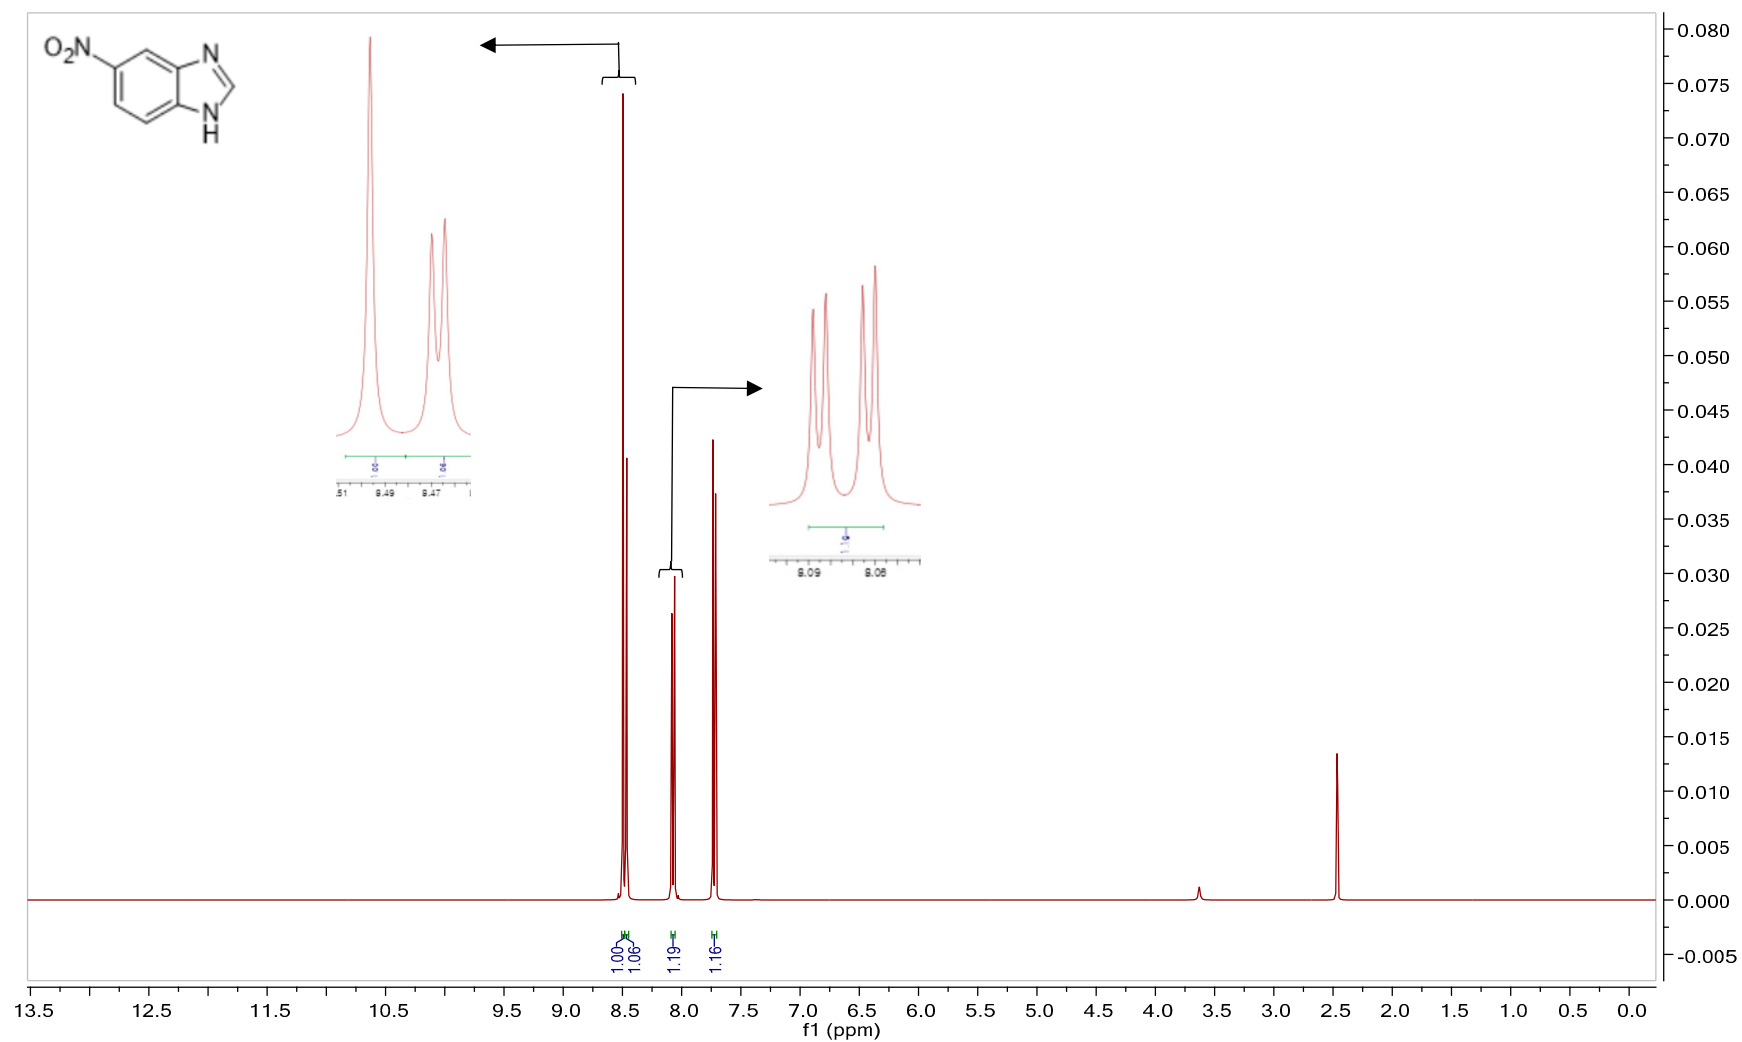

Figure S25.  $^1\text{H}$  NMR spectrum of analog 5-nitro-1H-benzo[d]imidazole

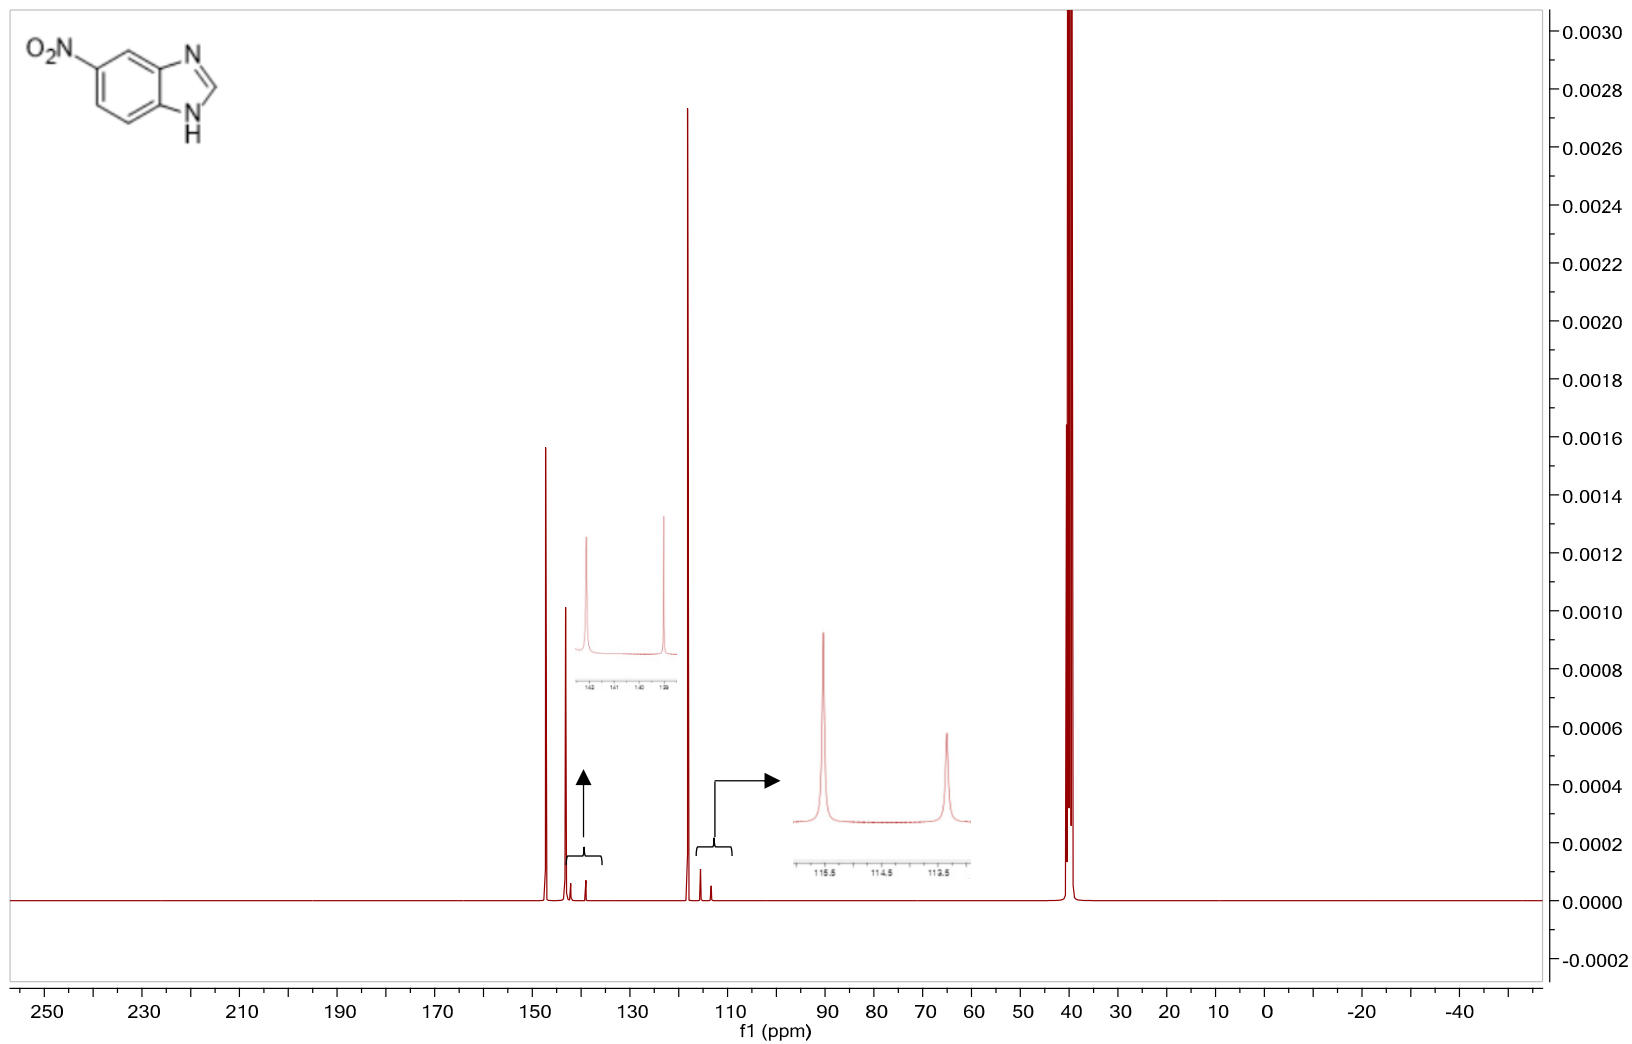

Figure S26. <sup>13</sup>C NMR spectrum of analog 5-nitro-1*H*-benzo[*d*]imidazole

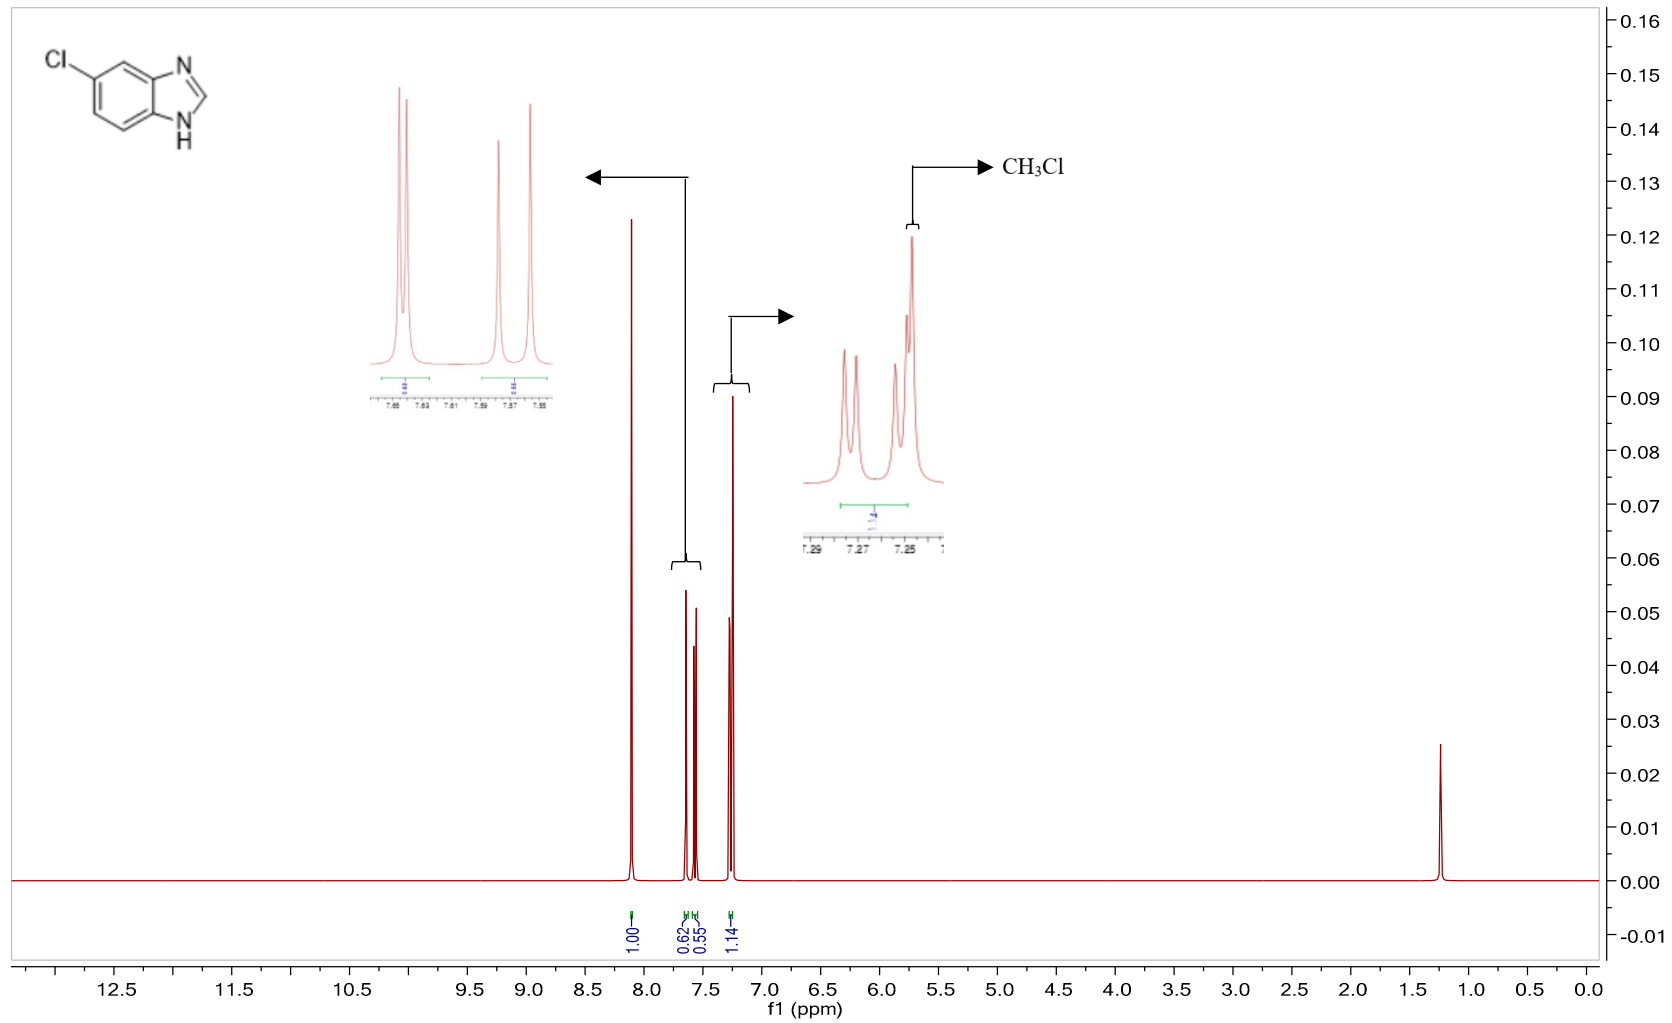

Figure S27. <sup>1</sup>H NMR spectrum of analog 5-chloro-1H-benzo[d]imidazole

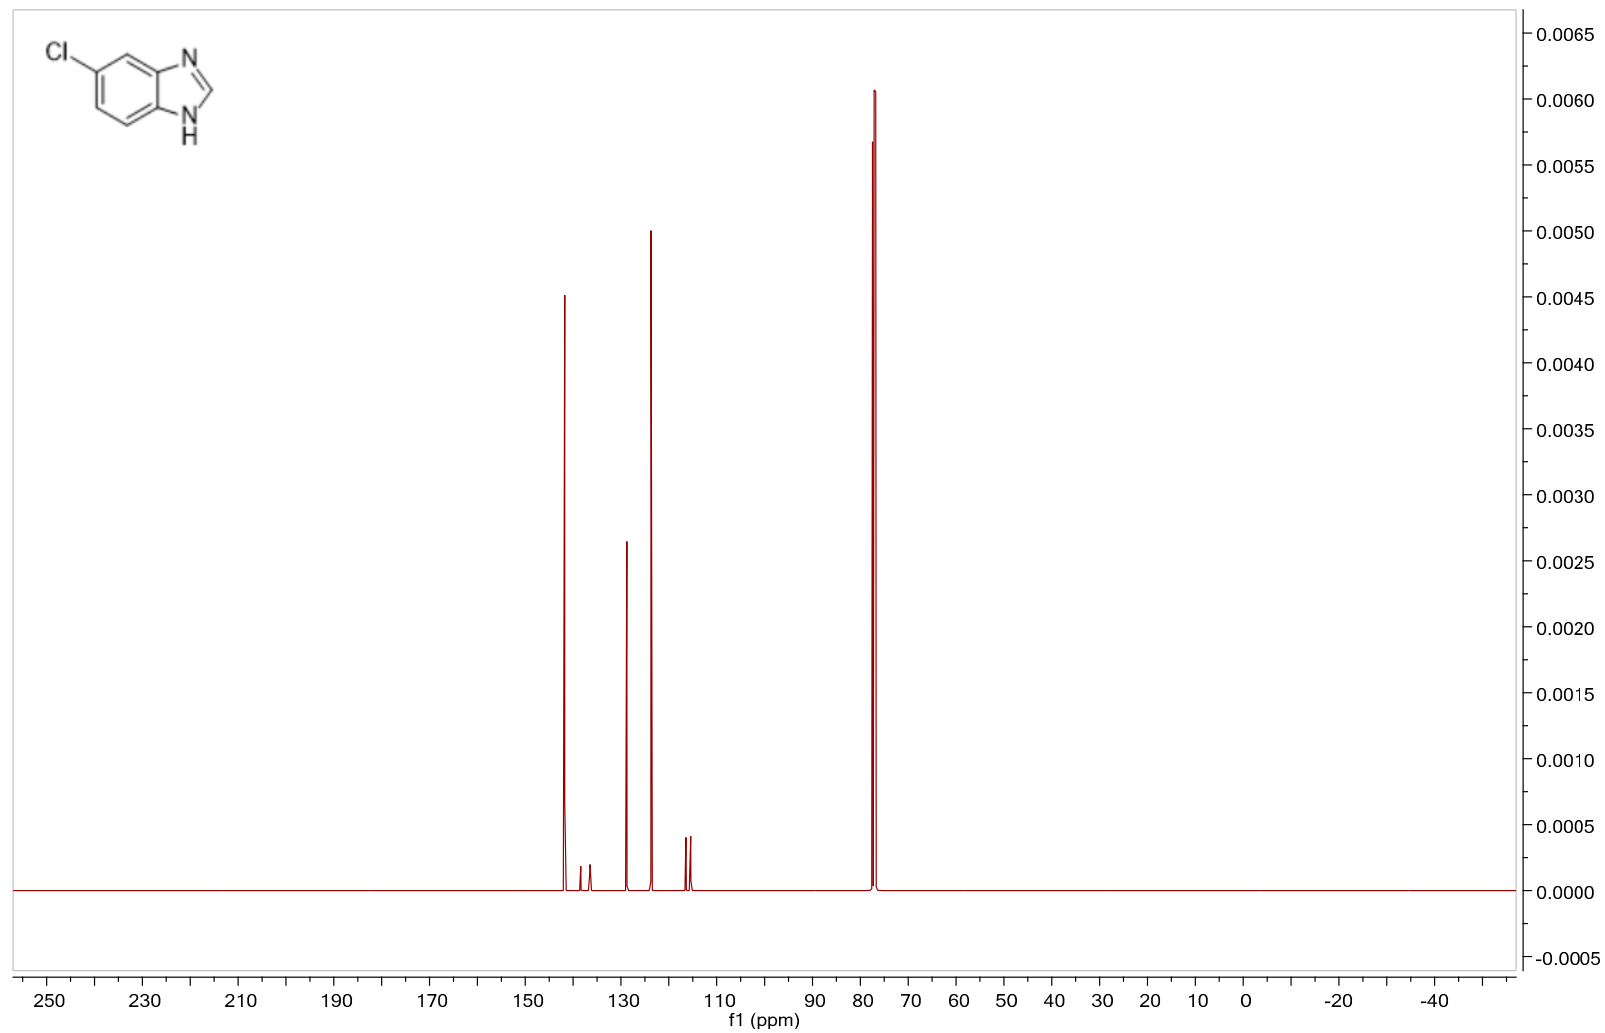

Figure S28.  $^{13}\text{C}$  NMR spectrum of analog 5-chloro-1H-benzo[d]imidazole
